# Supplementary material for: Vitamin D modulates gene expression in four major muscle tissues in Atlantic salmon
Source: Research Square preprint supplement (doi:10.21203/rs.3.rs-5267662/v1), 2025-05-15
Supplement: Supplementary file 1 [file 528420a7af18da8f66b342fe.xlsx]

## Sheet: S1-QC
sample	library	raw_reads	raw_bases	clean_reads	clean_bases	error_rate	Q20	Q30	GC_pct
DZER_B1_HEAR	ERRA230005711-2a	88727748	13.31G	86684672	13.0G	0.01	98.67	96.52	48.67
DTHO_B1_HEAR	ERAS230005713-2r	91835906	13.78G	86598948	12.99G	0.01	98.21	95.23	48.14
DZER_S1_HEAR	ERAS230005714-2r	91429188	13.71G	84945950	12.74G	0.01	98.14	94.97	48.26
DHUN_S1_HEAR	ERAS230005715-2r	82816788	12.42G	75807962	11.37G	0.01	98.19	95.17	47.87
DTHO_S1_HEAR	ERAS230005716-2r	81604870	12.24G	76275464	11.44G	0.01	98.12	95.01	47.39
DZER_B2_HEAR	ERAS230005717-2r	93970806	14.1G	88470212	13.27G	0.01	98.19	95.16	48.15
DHUN_B2_HEAR	ERAS230005718-2r	85019438	12.75G	79648324	11.95G	0.01	98.12	94.97	47.85
DTHO_B2_HEAR	ERAS230005719-2r	96174516	14.43G	91433362	13.72G	0.01	98.15	95.04	47.79
DZER_S2_HEAR	ERAS230005720-2r	108752634	16.31G	102021924	15.3G	0.01	98.15	95.05	48.55
DHUN_S2_HEAR	ERAS230005721-2r	88788220	13.32G	80147864	12.02G	0.01	97.96	94.56	48.42
DTHO_S2_HEAR	ERAS230005722-3r	80660792	12.1G	75708772	11.36G	0.01	98.06	94.87	48.19
DZER_B3_HEAR	ERAS230005723-2r	108862598	16.33G	101692086	15.25G	0.01	98.1	94.95	49.02
DHUN_B3_HEAR	ERAS230005724-2r	97169368	14.58G	92200420	13.83G	0.01	98.11	95	48.1
DTHO_B3_HEAR	ERAS230005725-2r	93677248	14.05G	87414722	13.11G	0.01	98.17	95.15	47.91
DZER_S3_HEAR	ERAS230005726-2r	84385004	12.66G	77859630	11.68G	0.01	97.93	94.49	48.37
DHUN_S3_HEAR	ERAS230005727-2r	87028104	13.05G	86805508	13.02G	0.01	97.95	94.56	48.2
DTHO_S3_HEAR	ERAS230005728-2r	80051874	12.01G	73029714	10.95G	0.01	98	94.64	48.07
DZER_B1_STOM	ERAS230005729-2r	83287226	12.49G	77592636	11.64G	0.01	98.36	95.5	49.68
DHUN_B1_STOM	ERAS230005730-2r	97873100	14.68G	89292240	13.39G	0.01	98.23	95.19	48.21
DTHO_B1_STOM	ERAS230005731-2r	87358124	13.1G	80562678	12.08G	0.01	98.24	95.22	49.91
DZER_S1_STOM	ERAS230005732-1r	97357500	14.6G	88530702	13.28G	0.01	98.09	94.9	47.83
DHUN_S1_STOM	ERAS230005733-2r	92250658	13.84G	83911880	12.59G	0.01	98.14	95.01	49.2
DTHO_S1_STOM	ERAS230005734-2r	86448858	12.97G	80469472	12.07G	0.01	98.02	94.7	48.8
DZER_B2_STOM	ERAS230005735-2r	119060832	17.86G	112430424	16.86G	0.01	98.24	95.15	50.59
DHUN_B2_STOM	ERAS230005736-2r	87036786	13.06G	81631298	12.24G	0.01	98.33	95.41	50.11
DTHO_B2_STOM	ERAS230005737-2r	88537724	13.28G	82530986	12.38G	0.01	98.06	94.65	50.59
DZER_S2_STOM	ERAS230005738-2r	88020864	13.2G	84518824	12.68G	0.01	98.15	94.92	49.61
DHUN_S2_STOM	ERAS230005739-1r	81531118	12.23G	81350366	12.2G	0.01	98.3	95.4	49.89
DTHO_S2_STOM	ERAS230005740-2r	86217558	12.93G	78902796	11.84G	0.01	98.12	94.83	50.15
DZER_B3_STOM	ERAS230005741-2r	83802088	12.57G	76510954	11.48G	0.01	98.1	94.78	50.37
DHUN_B3_STOM	ERAS230005742-1r	95658266	14.35G	90276574	13.54G	0.01	98.2	95.08	50.91
DTHO_B3_STOM	ERAS230005743-2r	87956924	13.19G	82479284	12.37G	0.01	98.27	95.26	50.41
DZER_S3_STOM	ERAS230005744-2r	94473484	14.17G	90671152	13.6G	0.01	98.1	94.93	49.23
DHUN_S3_STOM	ERAS230005745-2r	81451224	12.22G	75831332	11.37G	0.01	97.9	94.39	50.17
DTHO_S3_STOM	ERAS230005746-2r	89546894	13.43G	83944446	12.59G	0.01	98.19	95.12	50.53
DZER_B1_ADMS	ERAS230005747-1r	91771678	13.77G	84655408	12.7G	0.01	98.34	95.41	50.82
DHUN_B1_ADMS	ERAS230005748-1r	82837116	12.43G	78114772	11.72G	0.01	98.38	95.49	50.16
DTHO_B1_ADMS	ERAS230005749-1r	82234480	12.34G	77204554	11.58G	0.01	98.13	94.96	50.88
DZER_S1_ADMS	ERAS230005750-1r	116369222	17.46G	107848088	16.18G	0.01	98.3	95.29	50.6
DHUN_S1_ADMS	ERAS230005751-1r	92877252	13.93G	87241042	13.09G	0.01	98.31	95.36	50.68
DTHO_S1_ADMS	ERAS230005752-1r	93829766	14.07G	89964392	13.49G	0.01	98.28	95.26	50.46
DZER_B2_ADMS	ERAS230005753-1r	89019244	13.35G	83313944	12.5G	0.01	98.27	95.21	50.77
DHUN_B2_ADMS	ERAS230005754-1r	85330622	12.8G	78877268	11.83G	0.01	98.17	94.95	50.78
DTHO_B2_ADMS	ERAS230005755-1r	82144664	12.32G	77672068	11.65G	0.01	98.14	94.9	50.48
DZER_S2_ADMS	ERAS230005756-1r	92508106	13.88G	84020604	12.6G	0.01	98.34	95.38	51.15
DHUN_S2_ADMS	ERAS230005757-1r	80549168	12.08G	73236196	10.99G	0.01	98.29	95.3	50.48
DTHO_S2_ADMS	ERAS230005758-1r	80705638	12.11G	76738072	11.51G	0.01	98.28	95.25	50.22
DZER_B3_ADMS	ERAS230005759-1r	87605060	13.14G	81672084	12.25G	0.01	98.07	94.84	50.02
DHUN_B3_ADMS	ERAS230005760-1r	90455568	13.57G	82428346	12.36G	0.01	98.3	95.36	50.08
DTHO_B3_ADMS	ERAS230005761-1r	91348846	13.7G	85454570	12.82G	0.01	98.09	94.81	49.68
DZER_S3_ADMS	ERAS230005762-1r	79865406	11.98G	79700100	11.96G	0.01	98.06	94.78	50.09
DHUN_S3_ADMS	ERAS230005763-1r	84372288	12.66G	78890440	11.83G	0.01	98.31	95.42	48.91
DTHO_S3_ADMS	ERAS230005764-1r	84360968	12.65G	76072790	11.41G	0.01	98.33	95.45	48.82
DZER_B1_FILL	ERAS230005765-1r	98043406	14.71G	90641218	13.6G	0.01	98.3	95.37	48.17
DHUN_B1_FILL	ERAS230005766-1r	78697232	11.8G	72388502	10.86G	0.01	98.15	95.03	49.06
DTHO_B1_FILL	ERAS230005767-1r	86135300	12.92G	80463732	12.07G	0.01	98.06	94.71	50.13
DZER_S1_FILL	ERAS230005768-1r	89638706	13.45G	89463826	13.42G	0.01	98.28	95.34	50.62
DHUN_S1_FILL	ERAS230005769-1r	88098862	13.21G	82766504	12.41G	0.01	98.31	95.33	48.79
DTHO_S1_FILL	ERAS230005770-1r	84604100	12.69G	77834832	11.68G	0.01	98.2	95.02	50.04
DZER_B2_FILL	ERAS230005771-1r	90439162	13.57G	84549170	12.68G	0.01	98.3	95.3	50.31
DHUN_B2_FILL	ERAS230005772-1r	104142590	15.62G	98970864	14.85G	0.01	98.36	95.42	50.21
DTHO_B2_FILL	ERAS230005773-1r	80559076	12.08G	76430136	11.46G	0.01	98.27	95.25	48.75
DZER_S2_FILL	ERAS230005774-1r	89854500	13.48G	86101286	12.92G	0.01	98.2	95.16	48.88
DHUN_S2_FILL	ERAS230005775-2r	79952904	11.99G	74630858	11.19G	0.01	98.23	95.2	49.99
DTHO_S2_FILL	ERAS230005776-2r	82610492	12.39G	79232172	11.88G	0.01	98.16	94.93	49.7
DZER_B3_FILL	ERAS230005777-2r	82858896	12.43G	75774570	11.37G	0.01	98.06	94.66	50.35
DHUN_B3_FILL	ERAS230005778-2r	102539164	15.38G	96815772	14.52G	0.01	98.17	94.95	49.61
DTHO_B3_FILL	ERAS230005779-2r	95951202	14.39G	89279432	13.39G	0.01	98.27	95.26	50.29
DZER_S3_FILL	ERAS230005780-2r	83736606	12.56G	78812596	11.82G	0.01	98.38	95.47	50.32
DHUN_S3_FILL	ERAS230005781-2r	88652208	13.3G	80652936	12.1G	0.01	98.31	95.35	50.3
DTHO_S3_FILL	ERAS230005782-2r	83504796	12.53G	77520798	11.63G	0.01	98.36	95.43	50.48

## Sheet: S2-Mapping
sample	total_reads	total_map	unique_map	multi_map	read1_map	read2_map	positive_map	negative_map	splice_map	unsplice_map	proper_map
DZER_B1_HEAR	86684672	74489406(85.93%)	67284305(77.62%)	7205101(8.31%)	33767167(38.95%)	33517138(38.67%)	33630188(38.8%)	33654117(38.82%)	26608568(30.7%)	40675737(46.92%)	64877596(74.84%)
DTHO_B1_HEAR	86598948	71624226(82.71%)	67916155(78.43%)	3708071(4.28%)	34038450(39.31%)	33877705(39.12%)	33916941(39.17%)	33999214(39.26%)	28393205(32.79%)	39522950(45.64%)	62593188(72.28%)
DZER_S1_HEAR	84945950	70396505(82.87%)	66386334(78.15%)	4010171(4.72%)	33276430(39.17%)	33109904(38.98%)	33154386(39.03%)	33231948(39.12%)	28011483(32.98%)	38374851(45.18%)	59964824(70.59%)
DHUN_S1_HEAR	75807962	60887369(80.32%)	57155026(75.39%)	3732343(4.92%)	28664359(37.81%)	28490667(37.58%)	28541309(37.65%)	28613717(37.75%)	23077145(30.44%)	34077881(44.95%)	51455968(67.88%)
DTHO_S1_HEAR	76275464	61521441(80.66%)	56590394(74.19%)	4931047(6.46%)	28375897(37.2%)	28214497(36.99%)	28251901(37.04%)	28338493(37.15%)	20787695(27.25%)	35802699(46.94%)	50545854(66.27%)
DZER_B2_HEAR	88470212	71055024(80.32%)	67054486(75.79%)	4000538(4.52%)	33626399(38.01%)	33428087(37.78%)	33483877(37.85%)	33570609(37.95%)	27007448(30.53%)	40047038(45.27%)	60722264(68.64%)
DHUN_B2_HEAR	79648324	65861839(82.69%)	61687073(77.45%)	4174766(5.24%)	30929174(38.83%)	30757899(38.62%)	30799624(38.67%)	30887449(38.78%)	24347195(30.57%)	37339878(46.88%)	55487408(69.67%)
DTHO_B2_HEAR	91433362	76275917(83.42%)	71604475(78.31%)	4671442(5.11%)	35888768(39.25%)	35715707(39.06%)	35758537(39.11%)	35845938(39.2%)	28325166(30.98%)	43279309(47.33%)	64508810(70.55%)
DZER_S2_HEAR	102021924	85692480(83.99%)	80155831(78.57%)	5536649(5.43%)	40156171(39.36%)	39999660(39.21%)	40029755(39.24%)	40126076(39.33%)	34183890(33.51%)	45971941(45.06%)	72244724(70.81%)
DHUN_S2_HEAR	80147864	65216132(81.37%)	60317373(75.26%)	4898759(6.11%)	30255063(37.75%)	30062310(37.51%)	30137799(37.6%)	30179574(37.65%)	25014942(31.21%)	35302431(44.05%)	54073384(67.47%)
DTHO_S2_HEAR	75708772	62271080(82.25%)	57746212(76.27%)	4524868(5.98%)	28945387(38.23%)	28800825(38.04%)	28840120(38.09%)	28906092(38.18%)	23148512(30.58%)	34597700(45.7%)	52296948(69.08%)
DZER_B3_HEAR	101692086	85651183(84.23%)	79684316(78.36%)	5966867(5.87%)	39933529(39.27%)	39750787(39.09%)	39792886(39.13%)	39891430(39.23%)	33198511(32.65%)	46485805(45.71%)	73036968(71.82%)
DHUN_B3_HEAR	92200420	74294296(80.58%)	70425995(76.38%)	3868301(4.2%)	35314268(38.3%)	35111727(38.08%)	35172509(38.15%)	35253486(38.24%)	27628651(29.97%)	42797344(46.42%)	64034560(69.45%)
DTHO_B3_HEAR	87414722	71626044(81.94%)	67790403(77.55%)	3835641(4.39%)	33987275(38.88%)	33803128(38.67%)	33857210(38.73%)	33933193(38.82%)	26800655(30.66%)	40989748(46.89%)	61930906(70.85%)
DZER_S3_HEAR	77859630	62148372(79.82%)	58186748(74.73%)	3961624(5.09%)	29184971(37.48%)	29001777(37.25%)	29045229(37.3%)	29141519(37.43%)	24037522(30.87%)	34149226(43.86%)	51281322(65.86%)
DHUN_S3_HEAR	86805508	70348531(81.04%)	65670957(75.65%)	4677574(5.39%)	32930168(37.94%)	32740789(37.72%)	32784750(37.77%)	32886207(37.88%)	27052206(31.16%)	38618751(44.49%)	57722662(66.5%)
DTHO_S3_HEAR	73029714	60278151(82.54%)	56281678(77.07%)	3996473(5.47%)	28228599(38.65%)	28053079(38.41%)	28099392(38.48%)	28182286(38.59%)	22924428(31.39%)	33357250(45.68%)	50047988(68.53%)
DZER_B1_STOM	77592636	67075789(86.45%)	52205268(67.28%)	14870521(19.16%)	26157991(33.71%)	26047277(33.57%)	26086409(33.62%)	26118859(33.66%)	25907807(33.39%)	26297461(33.89%)	46600936(60.06%)
DHUN_B1_STOM	89292240	75624222(84.69%)	67601821(75.71%)	8022401(8.98%)	33875692(37.94%)	33726129(37.77%)	33778849(37.83%)	33822972(37.88%)	30670024(34.35%)	36931797(41.36%)	59091240(66.18%)
DTHO_B1_STOM	80562678	69239069(85.94%)	53698455(66.65%)	15540614(19.29%)	26904900(33.4%)	26793555(33.26%)	26856851(33.34%)	26841604(33.32%)	27168275(33.72%)	26530180(32.93%)	48032004(59.62%)
DZER_S1_STOM	88530702	72381889(81.76%)	66216851(74.8%)	6165038(6.96%)	33195915(37.5%)	33020936(37.3%)	33067971(37.35%)	33148880(37.44%)	26459974(29.89%)	39756877(44.91%)	59803510(67.55%)
DHUN_S1_STOM	83911880	71930975(85.72%)	63701040(75.91%)	8229935(9.81%)	31920014(38.04%)	31781026(37.87%)	31828230(37.93%)	31872810(37.98%)	29296127(34.91%)	34404913(41.0%)	57310916(68.3%)
DTHO_S1_STOM	80469472	65651972(81.59%)	55888530(69.45%)	9763442(12.13%)	28012606(34.81%)	27875924(34.64%)	27942740(34.72%)	27945790(34.73%)	23298433(28.95%)	32590097(40.5%)	51315542(63.77%)
DZER_B2_STOM	112430424	99824259(88.79%)	90804113(80.76%)	9020146(8.02%)	45486859(40.46%)	45317254(40.31%)	45382894(40.37%)	45421219(40.4%)	49572031(44.09%)	41232082(36.67%)	82767812(73.62%)
DHUN_B2_STOM	81631298	72960894(89.38%)	66964764(82.03%)	5996130(7.35%)	33555976(41.11%)	33408788(40.93%)	33447344(40.97%)	33517420(41.06%)	35072038(42.96%)	31892726(39.07%)	61450576(75.28%)
DTHO_B2_STOM	82530986	67466439(81.75%)	61868134(74.96%)	5598305(6.78%)	31019383(37.59%)	30848751(37.38%)	30906715(37.45%)	30961419(37.51%)	32842515(39.79%)	29025619(35.17%)	56452630(68.4%)
DZER_S2_STOM	84518824	74102997(87.68%)	68434277(80.97%)	5668720(6.71%)	34300540(40.58%)	34133737(40.39%)	34203113(40.47%)	34231164(40.5%)	35161053(41.6%)	33273224(39.37%)	62668440(74.15%)
DHUN_S2_STOM	81350366	71251050(87.59%)	65604285(80.64%)	5646765(6.94%)	32883860(40.42%)	32720425(40.22%)	32779184(40.29%)	32825101(40.35%)	33817818(41.57%)	31786467(39.07%)	58958252(72.47%)
DTHO_S2_STOM	78902796	68971448(87.41%)	62918894(79.74%)	6052554(7.67%)	31528562(39.96%)	31390332(39.78%)	31441063(39.85%)	31477831(39.89%)	32734929(41.49%)	30183965(38.25%)	56669798(71.82%)
DZER_B3_STOM	76510954	67169825(87.79%)	59863496(78.24%)	7306329(9.55%)	29997067(39.21%)	29866429(39.04%)	30011285(39.22%)	29852211(39.02%)	32649053(42.67%)	27214443(35.57%)	54149400(70.77%)
DHUN_B3_STOM	90276574	80525829(89.2%)	70558167(78.16%)	9967662(11.04%)	35360075(39.17%)	35198092(38.99%)	35316521(39.12%)	35241646(39.04%)	38819659(43.0%)	31738508(35.16%)	64460876(71.4%)
DTHO_B3_STOM	82479284	72014638(87.31%)	63428463(76.9%)	8586175(10.41%)	31790174(38.54%)	31638289(38.36%)	31745258(38.49%)	31683205(38.41%)	33677497(40.83%)	29750966(36.07%)	58670766(71.13%)
DZER_S3_STOM	90671152	80049524(88.29%)	74113396(81.74%)	5936128(6.55%)	37146456(40.97%)	36966940(40.77%)	37039691(40.85%)	37073705(40.89%)	34959575(38.56%)	39153821(43.18%)	67927504(74.92%)
DHUN_S3_STOM	75831332	66426142(87.6%)	61627257(81.27%)	4798885(6.33%)	30913551(40.77%)	30713706(40.5%)	30813197(40.63%)	30814060(40.63%)	30588820(40.34%)	31038437(40.93%)	56629864(74.68%)
DTHO_S3_STOM	83944446	75467586(89.9%)	65953567(78.57%)	9514019(11.33%)	33062705(39.39%)	32890862(39.18%)	32997202(39.31%)	32956365(39.26%)	35310259(42.06%)	30643308(36.5%)	61618630(73.4%)
DZER_B1_ADMS	84655408	73936911(87.34%)	65957064(77.91%)	7979847(9.43%)	33043677(39.03%)	32913387(38.88%)	33004300(38.99%)	32952764(38.93%)	36177969(42.74%)	29779095(35.18%)	60714330(71.72%)
DHUN_B1_ADMS	78114772	69006418(88.34%)	62716735(80.29%)	6289683(8.05%)	31414215(40.22%)	31302520(40.07%)	31379252(40.17%)	31337483(40.12%)	33704826(43.15%)	29011909(37.14%)	57778992(73.97%)
DTHO_B1_ADMS	77204554	68623450(88.89%)	64038525(82.95%)	4584925(5.94%)	32094124(41.57%)	31944401(41.38%)	32014244(41.47%)	32024281(41.48%)	34683933(44.92%)	29354592(38.02%)	59231980(76.72%)
DZER_S1_ADMS	107848088	95069393(88.15%)	85927889(79.67%)	9141504(8.48%)	43042971(39.91%)	42884918(39.76%)	42990934(39.86%)	42936955(39.81%)	46721911(43.32%)	39205978(36.35%)	77532598(71.89%)
DHUN_S1_ADMS	87241042	76936965(88.19%)	69215875(79.34%)	7721090(8.85%)	34671183(39.74%)	34544692(39.6%)	34614626(39.68%)	34601249(39.66%)	36870498(42.26%)	32345377(37.08%)	63584944(72.88%)
DTHO_S1_ADMS	89964392	79792087(88.69%)	70937407(78.85%)	8854680(9.84%)	35531688(39.5%)	35405719(39.36%)	35534218(39.5%)	35403189(39.35%)	39455924(43.86%)	31481483(34.99%)	64361778(71.54%)
DZER_B2_ADMS	83313944	74599094(89.54%)	65964194(79.18%)	8634900(10.36%)	33043438(39.66%)	32920756(39.51%)	33024521(39.64%)	32939673(39.54%)	36549977(43.87%)	29414217(35.31%)	59406668(71.3%)
DHUN_B2_ADMS	78877268	67988306(86.2%)	58952276(74.74%)	9036030(11.46%)	29543530(37.46%)	29408746(37.28%)	29504238(37.41%)	29448038(37.33%)	31733510(40.23%)	27218766(34.51%)	53028508(67.23%)
DTHO_B2_ADMS	77672068	67880668(87.39%)	59288266(76.33%)	8592402(11.06%)	29705918(38.25%)	29582348(38.09%)	29683159(38.22%)	29605107(38.12%)	31624468(40.72%)	27663798(35.62%)	54326478(69.94%)
DZER_S2_ADMS	84020604	73552251(87.54%)	64639256(76.93%)	8912995(10.61%)	32373288(38.53%)	32265968(38.4%)	32352979(38.51%)	32286277(38.43%)	35961191(42.8%)	28678065(34.13%)	58032178(69.07%)
DHUN_S2_ADMS	73236196	64879587(88.59%)	57266294(78.19%)	7613293(10.4%)	28698081(39.19%)	28568213(39.01%)	28648395(39.12%)	28617899(39.08%)	31013588(42.35%)	26252706(35.85%)	52075972(71.11%)
DTHO_S2_ADMS	76738072	63402266(82.62%)	55192648(71.92%)	8209618(10.7%)	27656155(36.04%)	27536493(35.88%)	27615184(35.99%)	27577464(35.94%)	28571673(37.23%)	26620975(34.69%)	49990374(65.14%)
DZER_B3_ADMS	81672084	66156936(81.0%)	50240755(61.52%)	15916181(19.49%)	25166663(30.81%)	25074092(30.7%)	25150924(30.8%)	25089831(30.72%)	22667753(27.75%)	27573002(33.76%)	46387346(56.8%)
DHUN_B3_ADMS	82428346	70318493(85.31%)	55821046(67.72%)	14497447(17.59%)	27965264(33.93%)	27855782(33.79%)	27895282(33.84%)	27925764(33.88%)	28907149(35.07%)	26913897(32.65%)	49613834(60.19%)
DTHO_B3_ADMS	85454570	73658821(86.2%)	61862233(72.39%)	11796588(13.8%)	31008523(36.29%)	30853710(36.11%)	30910286(36.17%)	30951947(36.22%)	30238426(35.39%)	31623807(37.01%)	54845634(64.18%)
DZER_S3_ADMS	79700100	67323932(84.47%)	52323467(65.65%)	15000465(18.82%)	26219523(32.9%)	26103944(32.75%)	26169721(32.84%)	26153746(32.82%)	26266382(32.96%)	26057085(32.69%)	46643646(58.52%)
DHUN_S3_ADMS	78890440	66088985(83.77%)	50707676(64.28%)	15381309(19.5%)	25410683(32.21%)	25296993(32.07%)	25362726(32.15%)	25344950(32.13%)	23779009(30.14%)	26928667(34.13%)	45129408(57.21%)
DTHO_S3_ADMS	76072790	64224356(84.42%)	56487232(74.25%)	7737124(10.17%)	28309921(37.21%)	28177311(37.04%)	28220879(37.1%)	28266353(37.16%)	25559874(33.6%)	30927358(40.65%)	50192058(65.98%)
DZER_B1_FILL	90641218	77348284(85.33%)	69619840(76.81%)	7728444(8.53%)	34876356(38.48%)	34743484(38.33%)	34793934(38.39%)	34825906(38.42%)	30302036(33.43%)	39317804(43.38%)	62523082(68.98%)
DHUN_B1_FILL	72388502	61069271(84.36%)	52741051(72.86%)	8328220(11.5%)	26417999(36.49%)	26323052(36.36%)	26344498(36.39%)	26396553(36.47%)	23916241(33.04%)	28824810(39.82%)	46997462(64.92%)
DTHO_B1_FILL	80463732	70118261(87.14%)	55038639(68.4%)	15079622(18.74%)	27588658(34.29%)	27449981(34.11%)	27523038(34.21%)	27515601(34.2%)	28370682(35.26%)	26667957(33.14%)	49196624(61.14%)
DZER_S1_FILL	89463826	77294800(86.4%)	59472792(66.48%)	17822008(19.92%)	29791082(33.3%)	29681710(33.18%)	29732593(33.23%)	29740199(33.24%)	32423855(36.24%)	27048937(30.23%)	53740484(60.07%)
DHUN_S1_FILL	82766504	71474827(86.36%)	58220917(70.34%)	13253910(16.01%)	29175002(35.25%)	29045915(35.09%)	29093956(35.15%)	29126961(35.19%)	27206126(32.87%)	31014791(37.47%)	52228972(63.1%)
DTHO_S1_FILL	77834832	66729453(85.73%)	51866553(66.64%)	14862900(19.1%)	25988852(33.39%)	25877701(33.25%)	25939120(33.33%)	25927433(33.31%)	27126362(34.85%)	24740191(31.79%)	46637700(59.92%)
DZER_B2_FILL	84549170	75401656(89.18%)	69399341(82.08%)	6002315(7.1%)	34764636(41.12%)	34634705(40.96%)	34680060(41.02%)	34719281(41.06%)	37159855(43.95%)	32239486(38.13%)	63698374(75.34%)
DHUN_B2_FILL	98970864	86769949(87.67%)	79526247(80.35%)	7243702(7.32%)	39843398(40.26%)	39682849(40.1%)	39706453(40.12%)	39819794(40.23%)	42857815(43.3%)	36668432(37.05%)	71780446(72.53%)
DTHO_B2_FILL	76430136	66479154(86.98%)	61466788(80.42%)	5012366(6.56%)	30791819(40.29%)	30674969(40.13%)	30675180(40.13%)	30791608(40.29%)	29732274(38.9%)	31734514(41.52%)	55731688(72.92%)
DZER_S2_FILL	86101286	75968931(88.23%)	70982673(82.44%)	4986258(5.79%)	35554491(41.29%)	35428182(41.15%)	35468646(41.19%)	35514027(41.25%)	33840020(39.3%)	37142653(43.14%)	65988070(76.64%)
DHUN_S2_FILL	74630858	65455798(87.71%)	61198207(82.0%)	4257591(5.7%)	30665359(41.09%)	30532848(40.91%)	30561359(40.95%)	30636848(41.05%)	31185085(41.79%)	30013122(40.22%)	55849154(74.83%)
DTHO_S2_FILL	79232172	70105441(88.48%)	64772973(81.75%)	5332468(6.73%)	32459324(40.97%)	32313649(40.78%)	32351173(40.83%)	32421800(40.92%)	33852929(42.73%)	30920044(39.02%)	59168580(74.68%)
DZER_B3_FILL	75774570	66357704(87.57%)	61219763(80.79%)	5137941(6.78%)	30683056(40.49%)	30536707(40.3%)	30588894(40.37%)	30630869(40.42%)	32681173(43.13%)	28538590(37.66%)	55678766(73.48%)
DHUN_B3_FILL	96815772	85924486(88.75%)	79020777(81.62%)	6903709(7.13%)	39585110(40.89%)	39435667(40.73%)	39469204(40.77%)	39551573(40.85%)	41149216(42.5%)	37871561(39.12%)	72065814(74.44%)
DTHO_B3_FILL	89279432	78878250(88.35%)	72811267(81.55%)	6066983(6.8%)	36501782(40.88%)	36309485(40.67%)	36358624(40.72%)	36452643(40.83%)	37738707(42.27%)	35072560(39.28%)	66172510(74.12%)
DZER_S3_FILL	78812596	70037703(88.87%)	64017937(81.23%)	6019766(7.64%)	32073152(40.7%)	31944785(40.53%)	31982307(40.58%)	32035630(40.65%)	34557413(43.85%)	29460524(37.38%)	58823890(74.64%)
DHUN_S3_FILL	80652936	70675798(87.63%)	65047947(80.65%)	5627851(6.98%)	32593290(40.41%)	32454657(40.24%)	32498868(40.29%)	32549079(40.36%)	34246839(42.46%)	30801108(38.19%)	59465268(73.73%)
DTHO_S3_FILL	77520798	68154510(87.92%)	62779184(80.98%)	5375326(6.93%)	31449195(40.57%)	31329989(40.41%)	31344882(40.43%)	31434302(40.55%)	34203215(44.12%)	28575969(36.86%)	57376426(74.01%)

## Sheet: S3-Moderate DEGs
Muscle	Gene ID	Fold change (log2)	Gene Name
AM	EX094662	3.4
stomach	EX116104	19.4
stomach	EX105051	-4.4
heart	EX088475	1.3	gas2a
heart	EX111598	-3.3
heart	EX004581	2.6	acd10
heart	EX017663	-3.4
heart	EX093886	-0.8	mtfr1l
heart	EX122198	0.6
heart	EX048915	1.8
heart	EX059264	5.5	frrs1
heart	EX093928	0.6

## Sheet: S4-High DEGs
ensemblID	muscle	baseMean	log2FoldChange.x	lfcSE	stat	pvalue	padj	biomart_gene_name	gene_name_original	gene_name_BLAST/NCBI	gene_name_all	Gene Description from Biomart, BLAST, or NCBI gene search	BLAST (Y/N)	NCBI sequence ID
ENSSSAG00000000094	heart	70.6961	-0.940464	0.292965	-3.21016	0.00132663	0.0481322	pacs2			pacs2
ENSSSAG00000000128	heart	836.697	0.496946	0.0927592	5.35738	8.44e-08	0.000126285					Salmo salar protein max	Y	XM_014177267.2
ENSSSAG00000000255	heart	1863.96	1.02501	0.270593	3.78801	0.00015186	0.0145847	bnip3	BNIP3		BNIP3	BCL2 Interacting Protein 3	N
ENSSSAG00000000689	heart	9800.31	0.398446	0.0906102	4.39736	1.1e-05	0.00343004		btf3		btf3	Basic Transcription Factor 3	N
ENSSSAG00000000800	heart	856.738	-0.499102	0.149866	-3.33032	0.000867468	0.0378495					sarcoplasmic/endoplasmic reticulum calcium ATPase 2	N
ENSSSAG00000000898	heart	191.019	-0.545047	0.168039	-3.24356	0.00118044	0.0449109	fcho2			fcho2
ENSSSAG00000000959	heart	215.4	-1.63193	0.335737	-4.86075	1.17e-06	0.000850856	gys1	gys1		gys1	Glycogen Synthase 1	N
ENSSSAG00000001043	heart	267.408	0.601932	0.139273	4.32194	1.55e-05	0.00433714	rnf113a	rnf113a		rnf113a	Ring Finger Protein 113A	N
ENSSSAG00000001458	heart	164.673	0.732438	0.1869	3.91888	8.9e-05	0.0110367					platelet endothelial cell adhesion molecule-like	N
ENSSSAG00000001473	heart	3435.28	-0.832341	0.233168	-3.56971	0.000357378	0.0225041	GOT1	GOT1		GOT1	Glutamic-Oxaloacetic Transaminase 1	N
ENSSSAG00000001480	heart	824.577	-0.409465	0.124831	-3.28015	0.0010375	0.0421913	abcb7			abcb7
ENSSSAG00000001506	heart	15590.3	0.43304	0.101198	4.27911	1.88e-05	0.00476557					no match	Y
ENSSSAG00000001538	heart	116.924	0.579499	0.154303	3.7556	0.000172928	0.0157875					Salmo salar zinc finger protein 3-like	Y	XM_045723797.1
ENSSSAG00000001563	heart	23821.3	-0.720958	0.225927	-3.19111	0.00141727	0.0498097	aldoaa			aldoaa
ENSSSAG00000001599	heart	506.917	-0.469135	0.12765	-3.67518	0.000237685	0.0184401	fus	fus		fus	FUS RNA Binding Protein	N
ENSSSAG00000001780	heart	963.976	0.758892	0.237037	3.20158	0.00136676	0.048994	ypel3			ypel3
ENSSSAG00000001858	heart	403.229	0.416312	0.122411	3.40095	0.000671523	0.0326909					NAD-dependent protein deacylase sirtuin-5, mitochondrial	N
ENSSSAG00000001874	filet	12.7607	4.61479	0.923012	4.99971	5.74e-07	0.00923222					Salmo salar tryptase	Y	XM_045710221.1
ENSSSAG00000001932	heart	440.958	-0.306971	0.090358	-3.39727	0.000680606	0.0329912					apoptosis-resistant E3 ubiquitin protein ligase 1-like	N
ENSSSAG00000001972	heart	1416.18	0.502187	0.150991	3.32593	0.000881231	0.0382639	anp32b			anp32b
ENSSSAG00000002140	heart	11053.5	0.321664	0.0994791	3.23349	0.00122289	0.0458607	RL18			RL18
ENSSSAG00000002161	heart	713.117	0.394185	0.105835	3.72454	0.000195671	0.0165053	UBC9			UBC9
ENSSSAG00000002415	heart	96.336	0.719487	0.198096	3.63202	0.000281216	0.0199929					transmembrane protein 39B-like	N
ENSSSAG00000002465	heart	146.255	1.8204	0.485421	3.75014	0.000176733	0.0158068	emp1	emp1		emp1	Epithelial Membrane Protein 1	N
ENSSSAG00000002540	heart	337.323	0.53475	0.161374	3.31373	0.00092061	0.0390911	pgam5			pgam5
ENSSSAG00000002569	heart	221.387	0.428201	0.12161	3.52109	0.00042977	0.0254282	brms1la			brms1la
ENSSSAG00000002735	heart	721.316	-0.588273	0.137769	-4.27	1.95e-05	0.00483788	mrpl12	mrpl12		mrpl12	Mitochondrial Ribosomal Protein L12	N
ENSSSAG00000002755	heart	179.394	-0.832411	0.22484	-3.70224	0.000213705	0.0170717					endoplasmic reticulum-Golgi intermediate compartment protein 2	N
ENSSSAG00000002780	heart	35.6715	1.11623	0.325582	3.42842	0.000607111	0.0304624		kctd17		kctd17	Potassium Channel Tetramerization Domain Containing 17	N
ENSSSAG00000002807	heart	678.559	0.442314	0.134945	3.27773	0.00104646	0.0424273	prkab1a			prkab1a
ENSSSAG00000002915	heart	218.356	0.505761	0.156455	3.23264	0.00122654	0.0458607	si:dkeyp-113d7.1			si:dkeyp-113d7.1
ENSSSAG00000003047	heart	280.282	0.447942	0.106884	4.19092	2.78e-05	0.00594797				caltractin	caltractin	N
ENSSSAG00000003089	heart	371.173	0.524773	0.122911	4.26954	1.96e-05	0.00483788	kbrs2	kbrs2		kbrs2		N
ENSSSAG00000003176	heart	13305.2	0.321605	0.096338	3.3383	0.000842932	0.0373848	rpl13a			rpl13a
ENSSSAG00000003309	heart	248.363	-0.497847	0.150341	-3.31145	0.000928132	0.0392865	GPHN	GPHN		GPHN	Gephyrin	N
ENSSSAG00000003539	heart	3166.74	-1.0022	0.244901	-4.09228	4.27e-05	0.00743618		uqcrc2a		uqcrc2a	Ubiquinol-Cytochrome C Reductase Core Protein 2	N
ENSSSAG00000003540	heart	448.957	-0.479258	0.13709	-3.49593	0.000472407	0.0268305	arhgef1b			arhgef1b
ENSSSAG00000003544	heart	398.065	0.45501	0.137051	3.32	0.000900176	0.0386501	mcrip1			mcrip1
ENSSSAG00000003591	heart	2569.69	-0.709181	0.210935	-3.36209	0.000773556	0.035905				fh	fumarate hydratase
ENSSSAG00000003721	heart	1522.97	-1.2004	0.337213	-3.55977	0.000371173	0.023077	CAVIN1	cavin1a		cavin1a		N
ENSSSAG00000003745	heart	2243.9	-0.737122	0.219667	-3.35563	0.000791842	0.0360697	ndufs8a			ndufs8a
ENSSSAG00000003766	heart	71.2656	0.625687	0.193538	3.23289	0.00122544	0.0458607					transmembrane protein 187
ENSSSAG00000003772	heart	40.9015	-0.764754	0.215856	-3.5429	0.000395758	0.0241592				pigg	phosphatidylinositol glycan anchor biosynthesis class G (EMM blood group)	N
ENSSSAG00000003854	heart	425.527	-0.358201	0.103386	-3.4647	0.000530832	0.0286807					multiple epidermal growth factor-like domains protein 8	N
ENSSSAG00000004144	heart	1289.67	0.77355	0.207635	3.72552	0.000194914	0.0165053	EZH1	EZH1		EZH1	Enhancer Of Zeste 1 Polycomb Repressive Complex 2 Subunit	N
ENSSSAG00000004305	heart	136.695	-0.579784	0.173955	-3.33296	0.000859263	0.0377584	gtpbp1l			gtpbp1l
ENSSSAG00000004360	heart	518.597	-0.664827	0.151961	-4.37497	1.21e-05	0.00375803					dnaJ homolog subfamily A member 3, mitochondrial-like	N
ENSSSAG00000004487	filet	11.5681	4.81448	1.02124	4.71434	2.42e-06	0.0259943					Salmo salar mucin-2-like	Y	XM_045721458.1
ENSSSAG00000004581	heart	33.1882	2.21144	0.665937	3.32079	0.000897638	0.0386501	acd10	acd10		acd10		N
ENSSSAG00000004801	heart	283.719	-1.56411	0.38226	-4.09174	4.28e-05	0.00743618	lrat	lrat		lrat	Lecithin Retinol Acyltransferase	N
ENSSSAG00000004822	heart	2270.28	0.394111	0.0864873	4.55687	5.19e-06	0.00240996	SRSF6	srsf6a		srsf6a	Serine And Arginine Rich Splicing Factor 6	N
ENSSSAG00000004843	heart	369.933	-0.527685	0.130461	-4.04478	5.24e-05	0.0083427	hipk3a			hipk3a
ENSSSAG00000004944	heart	242.509	-0.565376	0.151857	-3.72308	0.000196805	0.0165053	il11ra			il11ra
ENSSSAG00000005055	heart	416.185	-1.01381	0.207468	-4.8866	1.03e-06	0.000849517	PTPRB			PTPRB
ENSSSAG00000005296	heart	64.7381	-0.962253	0.226864	-4.24153	2.22e-05	0.00528884					Salmo salar dual-specificity tyrosine-(Y)-phosphorylation regulated kinase 2	Y	XM_045700200.1
ENSSSAG00000005415	ADMs	5562.78	1.33487	0.280189	4.76418	1.9e-06	0.0122395					large ribosomal subunit protein eL20	N
ENSSSAG00000005415	heart	7160.8	0.96139	0.299272	3.21243	0.00131616	0.0480113					large ribosomal subunit protein eL20	N
ENSSSAG00000005536	heart	3543.63	-0.776849	0.152294	-5.10098	3.38e-07	0.000349877					spectrin beta chain, erythrocytic-like	N
ENSSSAG00000005544	heart	263.118	-0.431365	0.12143	-3.55238	0.000381758	0.0234642	xpnpep1			xpnpep1
ENSSSAG00000005588	heart	417.168	0.466673	0.124506	3.74819	0.000178114	0.0158775	RASSF9	rassf9		rassf9	Ras Association Domain Family Member 9	N
ENSSSAG00000005870	heart	499.806	-0.669379	0.209469	-3.1956	0.00139542	0.0491351	slc30a9			slc30a9
ENSSSAG00000005924	heart	977.414	-0.6087	0.157422	-3.86667	0.00011033	0.0121729	oxa1l	oxa1l		oxa1l	OXA1L Mitochondrial Inner Membrane Protein	N
ENSSSAG00000006134	heart	4336.55	0.419659	0.0986971	4.25199	2.12e-05	0.00513884		rps27.2		rps27.2	Ribosomal protein S27	N
ENSSSAG00000006332	heart	354.475	-0.658012	0.183041	-3.59489	0.000324526	0.0217328			ttc7b	ttc7b	tetratricopeptide repeat domain 7B	N
ENSSSAG00000006564	heart	646.142	-0.377239	0.114685	-3.28935	0.0010042	0.0412103	SETD5			SETD5
ENSSSAG00000006569	heart	1407.84	0.314999	0.0917637	3.43272	0.000597555	0.0301816	ppm1g			ppm1g
ENSSSAG00000006583	heart	502.412	-0.362408	0.104132	-3.48027	0.000500905	0.0275764					CLIP-associating protein 1-B-like
ENSSSAG00000006610	heart	670.868	-0.407041	0.0863289	-4.715	2.42e-06	0.00141458	mrpl38	mrpl38		mrpl38	Mitochondrial Ribosomal Protein L38	N
ENSSSAG00000006635	heart	344.876	0.495672	0.150355	3.29667	0.000978384	0.0403287					methyl-CpG-binding domain protein 4	N
ENSSSAG00000006637	heart	326.802	-0.761811	0.196262	-3.88161	0.000103767	0.0118227				plexin-B2	plexin-B2	N
ENSSSAG00000006676	heart	90.6021	0.755671	0.208975	3.61609	0.000299092	0.020593					no match	Y
ENSSSAG00000006683	heart	4950.78	-0.853179	0.20631	-4.13542	3.54e-05	0.00689581	kpyk	kpyk		kpyk		N
ENSSSAG00000006753	heart	66.7757	-0.710548	0.222316	-3.19612	0.00139288	0.0491351	lhpp			lhpp
ENSSSAG00000006778	heart	614.099	0.400725	0.107565	3.72541	0.000194997	0.0165053	llph	llph		llph	LLP Homolog, Long-Term Synaptic Facilitation Factor	N
ENSSSAG00000006992	heart	794.43	-1.5873	0.491009	-3.23273	0.00122613	0.0458607					ornithine decarboxylase 1
ENSSSAG00000007060	heart	166.275	0.644825	0.177285	3.63722	0.000275598	0.0198766	TFAP4	TFAP4		TFAP4	Transcription Factor AP-4	N
ENSSSAG00000007074	heart	50.6153	-0.852468	0.20344	-4.19026	2.79e-05	0.00594797	CCSER1	ccser1		ccser1	Coiled-Coil Serine Rich Protein 1	N
ENSSSAG00000007137	heart	1105.21	-1.86431	0.457089	-4.07865	4.53e-05	0.00766947	cox4i2	cox4i2		cox4i2	Cytochrome C Oxidase Subunit 4I2	N
ENSSSAG00000007190	heart	210.027	-0.652048	0.1686	-3.86742	0.000109991	0.0121729					membrane-associated guanylate kinase, WW and PDZ domain-containing protein 2-like	N
ENSSSAG00000007259	heart	2050.79	-0.363416	0.102624	-3.54124	0.000398256	0.0242019	mtx2			mtx2
ENSSSAG00000007306	heart	285.771	0.507269	0.156983	3.23136	0.00123203	0.045885				zgc:154075	4,5-dihydroxyphthalate dehydrogenase
ENSSSAG00000007329	heart	1045.95	-0.918503	0.207831	-4.41946	9.89e-06	0.00323747	slc25a12	slc25a12		slc25a12	Solute Carrier Family 25 Member 12	N
ENSSSAG00000007419	heart	133.065	-0.69571	0.187849	-3.70356	0.000212596	0.0170336	rtn4ip1	rtn4ip1		rtn4ip1	Reticulon 4 Interacting Protein 1	N
ENSSSAG00000007436	heart	261.677	-0.549023	0.164391	-3.33974	0.000838567	0.0372526					serine/threonine-protein kinase WNK2
ENSSSAG00000007550	heart	1382.32	0.638897	0.196085	3.25826	0.00112097	0.0438496	EZH1			EZH1
ENSSSAG00000007599	heart	642.153	-1.01298	0.29097	-3.48139	0.000498817	0.0275177	pcca	pcca		pcca	Propionyl-CoA Carboxylase Subunit Alpha	N
ENSSSAG00000007650	heart	261.967	-0.822795	0.205507	-4.00374	6.23e-05	0.00877817	prep	prep		prep	Prolyl Endopeptidase	N
ENSSSAG00000007675	heart	163.914	-0.910657	0.251214	-3.62502	0.000288938	0.0202565	raph1b	raph1b		raph1b		N
ENSSSAG00000007690	heart	4702.68	-1.64433	0.443724	-3.70575	0.000210763	0.0170166	ACTA1	ACTA1		ACTA1	Actin Alpha 1, Skeletal Muscle	N
ENSSSAG00000007965	heart	1657.67	0.501793	0.0824503	6.08601	1.16e-09	4.45e-06		rps27.2		rps27.2	Ribosomal Protein S27	N
ENSSSAG00000007989	heart	979.272	-1.33478	0.305949	-4.36275	1.28e-05	0.0038851					dynamin-1-like protein	N
ENSSSAG00000008025	heart	54.8316	-0.781555	0.230437	-3.39162	0.000694813	0.033283	spred1	spred1		spred1	Sprouty Related EVH1 Domain Containing 1	N
ENSSSAG00000008196	heart	148.366	0.620977	0.188075	3.30175	0.000960854	0.0400949					no match
ENSSSAG00000008288	heart	101.506	-0.838976	0.250276	-3.35221	0.000801704	0.0362125	mrpl52			mrpl52
ENSSSAG00000008321	heart	174.431	0.918048	0.255507	3.59304	0.000326837	0.0217791	ptn	ptn		ptn	Pleiotrophin	N
ENSSSAG00000008433	heart	94.8051	-2.83799	0.791809	-3.58419	0.000338125	0.0222559					rho-associated protein kinase 2	N
ENSSSAG00000008774	heart	285.335	-0.495897	0.150372	-3.29779	0.000974491	0.0402946	dhx35	dhx35		dhx35	DEAH-Box Helicase 35	N
ENSSSAG00000008911	heart	898.733	-1.09393	0.226094	-4.83838	1.31e-06	0.000927349					aspartate aminotransferase, mitochondrial	N
ENSSSAG00000009186	heart	139.201	-0.599521	0.149073	-4.02165	5.78e-05	0.00854501	yars2	yars2		yars2	Tyrosyl-TRNA Synthetase 2	N
ENSSSAG00000009309	heart	645.76	0.490167	0.151812	3.22878	0.0012432	0.046036	rnaset2			rnaset2
ENSSSAG00000009439	heart	381.957	-1.17771	0.368471	-3.19621	0.00139247	0.0491351	SRL			SRL
ENSSSAG00000009468	heart	11458.7	0.362642	0.0996847	3.63789	0.000274883	0.0198766	rpl21	rpl21		rpl21	Ribosomal Protein L21	N
ENSSSAG00000009601	heart	1273.54	-0.659694	0.17939	-3.67742	0.000235606	0.0183797					sorting and assembly machinery component 50 homolog A	N
ENSSSAG00000009664	heart	4851.89	-0.407823	0.112874	-3.61308	0.000302586	0.0207275	mtpn			mtpn
ENSSSAG00000009667	heart	184.934	-0.786566	0.191034	-4.11742	3.83e-05	0.00713728				clgn	calmegin
ENSSSAG00000009744	heart	455.696	0.548916	0.141789	3.87136	0.000108231	0.0121404	meaf6	meaf6		meaf6	MYST/Esa1 Associated Factor 6	N
ENSSSAG00000009786	heart	781.084	-0.388238	0.0962944	-4.03178	5.54e-05	0.00854501	ralgapa1			ralgapa1
ENSSSAG00000009988	stomach	981.738	-3.6819	0.767975	-4.79429	1.63e-06	0.0171803					60S ribosomal protein L18a	N
ENSSSAG00000009988	heart	1378.93	-2.61463	0.701737	-3.72594	0.000194587	0.0165053					60S ribosomal protein L18a	N
ENSSSAG00000010025	heart	1023.66	-0.964146	0.283825	-3.39697	0.000681369	0.0329912	CAVIN1			CAVIN1
ENSSSAG00000010103	heart	3532.17	-0.556091	0.135756	-4.09624	4.2e-05	0.00742123	SOD1			SOD1
ENSSSAG00000010155	heart	432.233	-1.04284	0.214309	-4.86605	1.14e-06	0.000850856					mitochondrial import receptor subunit TOM40 homolog	N
ENSSSAG00000010173	heart	8041.65	-0.79712	0.176687	-4.51148	6.44e-06	0.00257812	aco2	aco2		aco2	Aconitase 2	N
ENSSSAG00000010242	heart	925.549	-1.39281	0.364021	-3.82618	0.000130146	0.013424	pygma	pygma		pygma	Glycogen Phosphorylase, Muscle Associated	N
ENSSSAG00000010304	heart	1087.49	-0.358605	0.108392	-3.30841	0.000938274	0.0396252					E3 ubiquitin-protein ligase MYCBP2
ENSSSAG00000010383	heart	316.848	-0.477119	0.110247	-4.32772	1.51e-05	0.00433714	BTBD7	BTBD7		BTBD7	BTB Domain Containing 7	N
ENSSSAG00000013302	heart	188.089	-0.918487	0.253091	-3.62908	0.000284437	0.020098					glycerol kinase
ENSSSAG00000013753	heart	88.2072	0.674393	0.176544	3.81997	0.000133467	0.0135486	cby1			cby1
ENSSSAG00000013940	heart	247.718	-0.678717	0.177979	-3.81348	0.000137025	0.0137132	acaca	acaca		acaca	Acetyl-CoA Carboxylase Alpha	N
ENSSSAG00000014558	heart	83.043	-1.45456	0.447681	-3.24911	0.00115767	0.0444957	cacna1sa			cacna1sa
ENSSSAG00000015127	heart	1071.76	-0.294225	0.0885397	-3.32309	0.000890263	0.0385938					rho guanine nucleotide exchange factor 10
ENSSSAG00000015449	heart	3403.62	0.457359	0.120407	3.79843	0.000145615	0.0142033	rs17			rs17
ENSSSAG00000015546	heart	1319.53	0.200897	0.0607827	3.30517	0.000949197	0.0399271	CHMP3			CHMP3
ENSSSAG00000015607	heart	1021.76	0.760217	0.168272	4.51779	6.25e-06	0.00256222	bccip	bccip		bccip	BRCA2 And CDKN1A Interacting Protein	N
ENSSSAG00000015746	heart	1613.04	-0.522554	0.144786	-3.60915	0.000307197	0.020884	eci1	eci1		eci1	Enoyl-CoA Delta Isomerase 1	N
ENSSSAG00000015847	heart	901.801	0.454091	0.136774	3.32001	0.000900153	0.0386501	tra2a	tra2a		tra2a	Transformer 2 Alpha Homolog	N
ENSSSAG00000019789	heart	205.242	0.384921	0.111251	3.45992	0.000540329	0.0286907	rbm12bb	rbm12b		rbm12b	RNA Binding Motif Protein 12B	N
ENSSSAG00000020503	heart	110.782	-0.413473	0.122373	-3.3788	0.000728026	0.0343845					no match	Y
ENSSSAG00000024733	heart	236.365	-0.652133	0.179112	-3.64091	0.000271674	0.0197669	ADCY6	adcy6b		adcy6b	Adenylate Cyclase 6	N
ENSSSAG00000026076	heart	8876.13	0.395349	0.123438	3.20282	0.00136091	0.0489711				rpl28	ribosomal protein L28
ENSSSAG00000027167	heart	161.261	-0.643326	0.165721	-3.88199	0.000103606	0.0118227					homeodomain-interacting protein kinase 1-like
ENSSSAG00000030127	heart	300.922	-0.888835	0.182002	-4.88366	1.04e-06	0.000849517	EPAS1	EPAS1		EPAS1	Endothelial PAS Domain Protein 1	N
ENSSSAG00000030622	heart	564.532	-0.360078	0.104389	-3.44939	0.000561863	0.0290325	mrps9	mrps9		mrps9	Mitochondrial Ribosomal Protein S9	N
ENSSSAG00000030661	heart	3192.3	-1.08187	0.277151	-3.90355	9.48e-05	0.0112416	AATM			AATM
ENSSSAG00000032973	heart	57.5183	-0.853054	0.188078	-4.53564	5.74e-06	0.00249366	pard6gb	pard6gb		pard6gb	Par-6 Family Cell Polarity Regulator Gamma	N
ENSSSAG00000035206	heart	298.834	-0.553527	0.14157	-3.90992	9.23e-05	0.0111826					patatin-like phospholipase domain-containing protein 6	N
ENSSSAG00000035325	heart	174.963	-0.586042	0.17656	-3.31922	0.000902698	0.0386967	ZNF516			ZNF516
ENSSSAG00000038939	heart	802.764	-0.850028	0.229092	-3.71042	0.000206915	0.0169354	SRL	SRL		SRL	Sarcalumenin	N
ENSSSAG00000039167	heart	355.599	-0.679028	0.188942	-3.59384	0.000325844	0.0217668					elongation factor Tu, mitochondrial-like	N
ENSSSAG00000039266	heart	250.201	-0.938013	0.239909	-3.90987	9.23e-05	0.0111826	ATAD3A	ATAD3A		ATAD3A	ATPase Family AAA Domain Containing 3A	N
ENSSSAG00000039297	heart	438.876	0.265843	0.0718492	3.70001	0.000215589	0.0171206					T-cell leukemia translocation-altered gene protein homolog
ENSSSAG00000039337	heart	596.031	-0.786439	0.175886	-4.47131	7.77e-06	0.00271804			naprt	naprt	nicotinate phosphoribosyltransferase	N
ENSSSAG00000039451	heart	86.1075	-0.930982	0.274183	-3.39547	0.000685103	0.0330531					rab-like protein 6
ENSSSAG00000039519	heart	6284.05	-0.763625	0.213659	-3.57403	0.000351527	0.0225041	AATM	got2a		got2a	Glutamic-Oxaloacetic Transaminase 2	N
ENSSSAG00000039750	heart	1152.41	0.46986	0.135324	3.47211	0.000516376	0.0281404	fbxo25	fbxo25		fbxo25	F-Box Protein 25	N
ENSSSAG00000039751	heart	84.8432	-1.19926	0.318481	-3.76556	0.000166178	0.0154265	IGFBP-5A			IGFBP-5A
ENSSSAG00000039853	heart	228.252	-0.897502	0.262584	-3.41796	0.000630927	0.0312641	fitm2	fitm2		fitm2	Fat Storage Inducing Transmembrane Protein 2	N
ENSSSAG00000040154	heart	138.466	-1.1572	0.315343	-3.66965	0.00024288	0.0186816		mylk4b		mylk4b	Myosin Light Chain Kinase Family Member 4	N
ENSSSAG00000040208	heart	1159.8	0.389205	0.10414	3.73733	0.000185982	0.0162041	HMGB1	HMGB1		HMGB1	High Mobility Group Box 1	N
ENSSSAG00000040214	heart	6071.97	-0.787998	0.197152	-3.9969	6.42e-05	0.00881495		nnt2		nnt2		N
ENSSSAG00000040221	ADMs	8.04123	-4.59035	1.06532	-4.30891	1.64e-05	0.0407286		cpz		cpz	carboxypeptidase Z	N
ENSSSAG00000040245	heart	734.939	-0.49926	0.153364	-3.2554	0.00113233	0.0441149				tpp2	tripeptidyl peptidase 2
ENSSSAG00000040371	heart	947.703	0.337533	0.0879286	3.83872	0.000123678	0.013057					Salmo salar clone ssal-rgb2-528-091 Small ubiquitin-related modifier 2 precursor putative mRNA, complete cds	Y	BT049306.2
ENSSSAG00000040482	heart	142.334	0.716358	0.159398	4.49414	6.99e-06	0.00262064	TFAP4	TFAP4		TFAP4	Transcription Factor AP-4	N
ENSSSAG00000040541	heart	569.691	-0.680489	0.176533	-3.85474	0.000115853	0.0126784	hipk3a	hipk3a		hipk3a	Homeodomain Interacting Protein Kinase 3	N
ENSSSAG00000040563	heart	1303.23	-1.2279	0.324217	-3.78727	0.000152309	0.0145847	desma			desma
ENSSSAG00000040671	heart	1970.18	-0.817675	0.188991	-4.32653	1.51e-05	0.00433714	phb2b			phb2b	prohibitin 2b	N
ENSSSAG00000040727	heart	597.515	0.37532	0.114477	3.27856	0.00104339	0.0423669					adaptin ear-binding coat-associated protein 2
ENSSSAG00000040847	heart	726.274	0.313992	0.0847175	3.70634	0.000210277	0.0170166	cf166	cf166		cf166		N
ENSSSAG00000041016	heart	325.322	0.842667	0.196911	4.27943	1.87e-05	0.00476557	zgc:112271	zgc:112271		zgc:112271		N
ENSSSAG00000041135	heart	403.578	-0.590339	0.15356	-3.84436	0.000120868	0.0129123	cpsf1	cpsf1		cpsf1	Cleavage And Polyadenylation Specific Factor 1	N
ENSSSAG00000041206	heart	3636.01	-0.668535	0.205682	-3.25033	0.00115269	0.0444792					NADH-ubiquinone oxidoreductase 75 kDa subunit, mitochondrial-like
ENSSSAG00000041331	heart	347.151	-0.684649	0.11993	-5.70875	1.14e-08	3.06e-05			ubr4	ubr4	Salmo salar ubiquitin protein ligase E3 component n-recognin 4 (ubr4)	Y	XM_045696483.1
ENSSSAG00000041485	heart	406.35	-0.661213	0.183119	-3.61083	0.00030522	0.0208021					FAST kinase domain-containing protein 4	N
ENSSSAG00000041527	heart	501.352	-0.803416	0.200455	-4.00797	6.12e-05	0.00874994	RM46	mrpl46		mrpl46	Mitochondrial Ribosomal Protein L46	N
ENSSSAG00000041564	heart	482.309	0.362891	0.100324	3.61718	0.000297833	0.0205589	arhgap1	arhgap1		arhgap1	Rho GTPase Activating Protein 1	N
ENSSSAG00000041616	heart	208.9	-0.481137	0.129674	-3.71036	0.000206967	0.0169354				mrpl52	mitochondrial ribosomal protein L52	N
ENSSSAG00000041707	heart	303.437	0.316206	0.0922373	3.42818	0.000607641	0.0304624	ubxn8			ubxn8
ENSSSAG00000041962	heart	651.592	-0.332206	0.0853409	-3.8927	9.91e-05	0.0115036	hnrnph1	hnrnph1		hnrnph1	Heterogeneous Nuclear Ribonucleoprotein H1	N
ENSSSAG00000041995	heart	211.424	0.715858	0.186864	3.8309	0.000127673	0.0132195					mediator of RNA polymerase II transcription subunit 7	N
ENSSSAG00000042048	heart	12834.3	0.3533	0.0916954	3.85297	0.000116694	0.0127187					Salmo trutta ribonuclease H1-like¬†	Y	XM_029733194.1
ENSSSAG00000042221	heart	993.296	-0.506811	0.131763	-3.84637	0.00011988	0.0128764	acox1			acox1
ENSSSAG00000042280	heart	143.263	-0.646594	0.197015	-3.28196	0.0010309	0.0420497					transmembrane protein 94-like
ENSSSAG00000042438	heart	146.835	-0.915472	0.28622	-3.1985	0.00138147	0.0491351					ski-like protein
ENSSSAG00000042513	heart	47.6911	0.725956	0.189318	3.83458	0.00012578	0.0131245	tfap2c	tfap2c		tfap2c	Transcription Factor AP-2 Gamma	N
ENSSSAG00000042515	heart	746.891	-0.822312	0.235707	-3.48871	0.000485359	0.0271086	TRAP1			TRAP1
ENSSSAG00000042542	heart	541.763	-0.475536	0.124511	-3.81923	0.00013387	0.0135486	zfr			zfr
ENSSSAG00000042572	heart	484.018	-0.611821	0.16771	-3.64808	0.000264206	0.0194868	FARS2	FARS2		FARS2	Phenylalanyl-TRNA Synthetase 2, Mitochondrial	N
ENSSSAG00000042573	heart	587.351	0.293279	0.0877558	3.34199	0.000831786	0.0372526	usf1			usf1
ENSSSAG00000042664	heart	1353.94	-1.57817	0.367633	-4.29278	1.76e-05	0.00471275	gys1	gys1		gys1	Glycogen Synthase 1	N
ENSSSAG00000042878	heart	327.648	-0.526206	0.141688	-3.71384	0.000204136	0.0168734					probable E3 ubiquitin-protein ligase HERC1
ENSSSAG00000042984	heart	1699.93	-0.962156	0.28239	-3.40719	0.000656353	0.0321852		uqcrc2a		uqcrc2a	Ubiquinol-Cytochrome C Reductase Core Protein 2	N
ENSSSAG00000042986	heart	256.245	-0.44896	0.139691	-3.21396	0.0013092	0.0478222	DOP1B			DOP1B
ENSSSAG00000043221	heart	322.623	-0.487775	0.118523	-4.11546	3.86e-05	0.00713728				taok2b	TAO kinase 2b
ENSSSAG00000043281	heart	3795.41	-0.785139	0.181097	-4.33545	1.45e-05	0.00433714	tpi1b	tpi1b		tpi1b	Triosephosphate Isomerase 1	N
ENSSSAG00000043325	heart	52.4443	0.675657	0.203412	3.32161	0.000894985	0.0386501					zinc finger protein 570	N
ENSSSAG00000043370	heart	1134.37	-0.542609	0.114544	-4.73713	2.17e-06	0.00132626	PSME4	PSME4		PSME4	Proteasome Activator Subunit 4	N
ENSSSAG00000043543	heart	1043.66	0.462493	0.136675	3.3839	0.00071465	0.0341119	blvrb			blvrb
ENSSSAG00000043647	heart	191.57	-0.981503	0.262185	-3.74355	0.000181436	0.0159622	cspg4			cspg4
ENSSSAG00000043685	heart	36.2818	0.831529	0.252117	3.29819	0.000973103	0.0402946					fibulin-7-like
ENSSSAG00000043915	heart	420.446	-0.355833	0.108333	-3.28461	0.00102123	0.0417819				psd3l	pleckstrin and Sec7 domain containing 3
ENSSSAG00000043938	heart	1122.28	-0.574733	0.112473	-5.10996	3.22e-07	0.000346978	ap1b1	ap1b1		ap1b1	Adaptor Related Protein Complex 1 Subunit Beta 1	N
ENSSSAG00000043995	heart	96.0171	-0.797653	0.247183	-3.22697	0.00125109	0.0461418	acaca			acaca
ENSSSAG00000044010	heart	14921.3	0.403745	0.110714	3.64673	0.000265599	0.0195196	rpl7	RL7		RL7		N
ENSSSAG00000044188	heart	14297.1	0.375483	0.104377	3.59736	0.000321459	0.021635	rl19			rl19
ENSSSAG00000044736	heart	1098.67	-0.982729	0.260304	-3.77531	0.000159809	0.0151248	cpox	cpox		cpox	Coproporphyrinogen Oxidase	N
ENSSSAG00000044819	heart	610.525	0.336793	0.072653	4.63564	3.56e-06	0.00184224	BCAS2	BCAS2		BCAS2	BCAS2 Pre-MRNA Processing Factor	N
ENSSSAG00000044876	heart	549.192	-0.389526	0.119791	-3.25171	0.00114712	0.04437					SWI/SNF complex subunit SMARCC1-like
ENSSSAG00000044913	heart	1322.74	-0.433913	0.132583	-3.27277	0.001065	0.0427922	ndufv3			ndufv3
ENSSSAG00000044915	heart	294.959	-0.638443	0.17119	-3.72945	0.000191896	0.0164524	OPA1	OPA1		OPA1	OPA1 Mitochondrial Dynamin Like GTPase	N
ENSSSAG00000044965	ADMs	208.38	-1.73191	0.39162	-4.42243	9.76e-06	0.0262478	psat1	psat1		psat1	Phosphoserine Aminotransferase 1	N
ENSSSAG00000044994	heart	457.552	-0.570183	0.172701	-3.30156	0.000961492	0.0400949	iars1	iars1		iars1	Isoleucyl-TRNA Synthetase 1	N
ENSSSAG00000045122	heart	1131.89	0.486265	0.122825	3.95902	7.53e-05	0.00983517	brox	brox		brox	BRO1 Domain And CAAX Motif Containing	N
ENSSSAG00000045173	heart	576.08	-0.490781	0.10782	-4.55185	5.32e-06	0.00242642	ap1b1	ap1b1		ap1b1	Adaptor Related Protein Complex 1 Subunit Beta 1	N
ENSSSAG00000045401	heart	361.933	-0.499023	0.115963	-4.30331	1.68e-05	0.00467001				si:dkey-13n15.2	protein transport protein Sec24C-like	N
ENSSSAG00000045463	heart	11463.7	0.437947	0.0775445	5.64769	1.63e-08	3.68e-05	rpl26	rpl26		rpl26	Ribosomal Protein L26	N
ENSSSAG00000045549	heart	517.751	-0.407021	0.111988	-3.63452	0.000278504	0.0199404	pggt1b			pggt1b
ENSSSAG00000045556	heart	194.121	-0.679928	0.189795	-3.58243	0.000340407	0.0222971	cpeb4a			cpeb4a
ENSSSAG00000045586	heart	390.498	-0.718793	0.20634	-3.48353	0.000494848	0.0273548	ppox	ppox		ppox	Protoporphyrinogen Oxidase	N
ENSSSAG00000045678	heart	168.718	-0.535336	0.167024	-3.20514	0.00134995	0.048847	mix23			mix23
ENSSSAG00000045777	heart	5037.58	-0.797244	0.163723	-4.86945	1.12e-06	0.000850856			ogdha	ogdha	oxoglutarate dehydrogenase a	N
ENSSSAG00000045784	heart	372.05	-0.599139	0.173385	-3.45555	0.000549177	0.0290032	rhpn2			rhpn2
ENSSSAG00000045815	heart	318.437	-0.535784	0.128822	-4.1591	3.2e-05	0.00641993	RT07	MRPS7		MRPS7	Mitochondrial Ribosomal Protein S7	N
ENSSSAG00000046083	heart	714.286	-0.992998	0.246359	-4.03069	5.56e-05	0.00854501		lonp1		lonp1	Lon Peptidase 1, Mitochondrial	N
ENSSSAG00000046230	heart	1881.71	0.38951	0.0871753	4.46812	7.89e-06	0.00272349					serine/arginine-rich splicing factor 7	N
ENSSSAG00000046359	heart	228.384	0.584179	0.157522	3.70855	0.000208447	0.0170049	tmem237b	tmem237b		tmem237b	Transmembrane Protein 237	N
ENSSSAG00000046579	heart	73.4228	-1.01377	0.253386	-4.00089	6.31e-05	0.00877817					no match	Y
ENSSSAG00000046597	heart	5208.52	-0.390975	0.0938101	-4.16773	3.08e-05	0.00627446					filamin-C-like
ENSSSAG00000046726	heart	1900.91	0.337759	0.0839711	4.02232	5.76e-05	0.00854501	rpl19			rpl19
ENSSSAG00000046794	heart	235.484	-0.721319	0.186951	-3.85834	0.000114162	0.0125443			gpam	gpam	glycerol-3-phosphate acyltransferase, mitochondrial	N
ENSSSAG00000046858	heart	630.102	0.36378	0.0983833	3.69758	0.000217666	0.0172302	ufd1l			ufd1l
ENSSSAG00000047010	heart	44.5368	-0.822923	0.244869	-3.36066	0.000777562	0.0360288					F-box only protein 41-like
ENSSSAG00000047059	heart	4900.48	0.737668	0.202141	3.64928	0.000262976	0.0194494	oaz2a	oaz2a		oaz2a	ornithine decarboxylase antizyme 2a	N
ENSSSAG00000047065	heart	248.537	-0.672487	0.205605	-3.27077	0.00107254	0.042948				i2c3	Eukaryotic translation initiation factor 2C 3
ENSSSAG00000047130	heart	920.696	-0.656696	0.145758	-4.50537	6.63e-06	0.00257812	fam13b			fam13b
ENSSSAG00000047138	heart	137.715	0.560727	0.151885	3.69178	0.000222691	0.0175295					reticulon-3-like	N
ENSSSAG00000047298	heart	291.696	0.803924	0.1969	4.0829	4.45e-05	0.00757822	CSK22	CSK22		CSK22		N
ENSSSAG00000047369	heart	746.587	0.262921	0.0759414	3.46216	0.000535854	0.0286807	sumo1			sumo1
ENSSSAG00000047398	heart	997.514	0.449562	0.125636	3.57829	0.000345844	0.0225041			eif4ebp1	eif4ebp1	eukaryotic translation initiation factor 4E binding protein 1	N
ENSSSAG00000047444	heart	985.724	0.891928	0.250063	3.56681	0.000361352	0.0226042					thrombospondin-2
ENSSSAG00000047832	heart	1256.79	0.350162	0.0960888	3.64415	0.000268277	0.0196258	ERH	ERH		ERH	ERH mRNA splicing and mitosis factor	N
ENSSSAG00000047894	heart	974.815	-0.336625	0.0964011	-3.49192	0.00047956	0.0270479	EIF4G1			EIF4G1
ENSSSAG00000047895	heart	2069.6	-0.573306	0.164549	-3.48411	0.000493776	0.0273548	samm50l	samm50l		samm50l	SAMM50 Sorting And Assembly Machinery Component	N
ENSSSAG00000047920	heart	1763.59	-0.517301	0.159733	-3.23854	0.00120143	0.0454905	mrpl37			mrpl37
ENSSSAG00000047938	heart	155.923	-0.555143	0.173363	-3.20221	0.00136378	0.0489711	tubgcp4			tubgcp4
ENSSSAG00000047960	heart	3593.73	-0.722736	0.202102	-3.5761	0.000348758	0.0225041					stress-70 protein, mitochondrial	N
ENSSSAG00000048030	heart	809.878	-0.749026	0.221957	-3.37464	0.00073912	0.0346652					kinesin-1 heavy chain-like	N
ENSSSAG00000048037	heart	546.729	0.500899	0.133718	3.74595	0.000179712	0.0159622	tbl1x	tbl1x		tbl1x	Transducin Beta Like 1 X-Linked	N
ENSSSAG00000048349	heart	80.4018	0.582895	0.180447	3.2303	0.00123663	0.0459189	stard14			stard14
ENSSSAG00000048431	heart	213.049	-0.565993	0.134058	-4.22199	2.42e-05	0.00566866	agtpbp1	agtpbp1		agtpbp1	ATP/GTP Binding Carboxypeptidase 1	N
ENSSSAG00000048588	heart	44.2517	0.685303	0.204027	3.35888	0.000782589	0.0360681					oocyte zinc finger protein XlCOF22-likev
ENSSSAG00000048838	heart	119.932	-0.495356	0.146599	-3.37899	0.000727524	0.0343845	plekhm3			plekhm3
ENSSSAG00000049260	heart	443.707	0.500169	0.156437	3.19725	0.00138745	0.0491351	trappc13			trappc13
ENSSSAG00000049346	heart	740.825	-0.896383	0.221357	-4.04949	5.13e-05	0.00832436					Salmo salar obscurin	Y	XM_045694213.1
ENSSSAG00000049398	heart	4372.51	-0.674484	0.200831	-3.35846	0.000783769	0.0360681					no match
ENSSSAG00000049415	heart	5436.61	-0.677873	0.199767	-3.39332	0.000690505	0.0331675	srl	srl		srl	Sarcalumenin	N
ENSSSAG00000049601	heart	2585.48	-0.570729	0.150434	-3.79387	0.000148314	0.0144143	ARHGAP35			ARHGAP35
ENSSSAG00000049688	heart	634.949	-0.79878	0.196668	-4.06157	4.87e-05	0.00809605					ATPase family AAA domain-containing protein 3	N
ENSSSAG00000049726	heart	698.261	0.28745	0.0832788	3.45166	0.000557143	0.0290325				acp7	acid phosphatase 7, tartrate resistant (putative)
ENSSSAG00000049764	heart	692.017	-0.652737	0.160101	-4.07704	4.56e-05	0.00767469		megf8		megf8	Multiple EGF Like Domains 8	N
ENSSSAG00000049829	heart	7569.51	0.346165	0.101849	3.39879	0.00067684	0.0328903					60S ribosomal protein L23	N
ENSSSAG00000049830	heart	1985.29	0.438935	0.119087	3.68584	0.000227952	0.0178912	nop56	nop56		nop56	NOP56 Ribonucleoprotein	N
ENSSSAG00000050237	heart	297.102	-0.683325	0.185824	-3.67728	0.000235738	0.0183797					cAMP-specific 3',5'-cyclic phosphodiesterase 4D-like	N
ENSSSAG00000050260	heart	639.627	0.619153	0.175048	3.53706	0.000404613	0.0244777					no match
ENSSSAG00000050349	heart	291.32	-0.593723	0.13811	-4.29891	1.72e-05	0.00468186	mief1	mief1		mief1	Mitochondrial Elongation Factor 1	N
ENSSSAG00000050408	heart	789.809	0.391618	0.106793	3.66709	0.000245325	0.0187901	UBC9			UBC9
ENSSSAG00000050867	heart	437.003	-0.523926	0.0835088	-6.27391	3.52e-10	1.63e-06				tars2	threonyl-tRNA synthetase 2, mitochondrial	N
ENSSSAG00000050910	heart	170.238	-0.885282	0.243445	-3.63647	0.000276401	0.0198766					spectrin beta chain, non-erythrocytic 4
ENSSSAG00000051502	heart	755.637	-0.942408	0.200524	-4.69973	2.61e-06	0.00146106	slc16a1a	slc16a1a		slc16a1a		N
ENSSSAG00000051545	heart	784.879	-0.534369	0.149569	-3.57272	0.000353296	0.0225041					FERM domain-containing protein 4A
ENSSSAG00000051664	heart	150.122	0.519712	0.150122	3.46192	0.000536331	0.0286807	mfsd13a	mfsd13a		mfsd13a	Major Facilitator Superfamily Domain Containing 13A	N
ENSSSAG00000051691	heart	101.474	0.539425	0.139376	3.87028	0.000108709	0.0121434	spast	spast		spast	Spastin	N
ENSSSAG00000052007	heart	22042.9	0.352334	0.105084	3.35287	0.000799781	0.0361922	RPS3A	RPS3A		RPS3A	Ribosomal Protein S3A	N
ENSSSAG00000052014	heart	299.018	0.549476	0.165773	3.31463	0.000917649	0.0390269					programmed cell death protein 7-like	N
ENSSSAG00000052162	heart	814.126	-0.333351	0.0997638	-3.3414	0.000833566	0.0372526	VPS13A			VPS13A
ENSSSAG00000052180	heart	499.314	0.67158	0.146407	4.58709	4.49e-06	0.00216072	lmo2	lmo2		lmo2	LIM Domain Only 2	N
ENSSSAG00000052210	heart	1180.68	0.402808	0.116343	3.46225	0.000535686	0.0286807	dap			dap
ENSSSAG00000052259	heart	2372.11	-0.81014	0.2111	-3.8377	0.000124192	0.01306		si:ch1073-174d20.2		si:ch1073-174d20.2		N
ENSSSAG00000052276	heart	3869.17	-0.50482	0.157604	-3.20309	0.00135962	0.0489711	epb41l3b			epb41l3b
ENSSSAG00000052715	heart	114.773	-0.766249	0.221976	-3.45194	0.000556568	0.0290325	ABCD2			ABCD2
ENSSSAG00000052772	heart	498.9	-0.397724	0.102109	-3.89509	9.82e-05	0.0114399	p5cs	p5cs		p5cs		N
ENSSSAG00000053115	heart	334.696	-0.420918	0.114682	-3.67031	0.000242255	0.0186816	tax1bp1a			tax1bp1a
ENSSSAG00000053156	heart	140.012	0.65334	0.196072	3.33215	0.00086179	0.0377854					abhydrolase domain containing 12, lysophospholipase
ENSSSAG00000053474	heart	432.03	-0.599005	0.175682	-3.40959	0.000650598	0.0320196	pmpcb			pmpcb
ENSSSAG00000053481	heart	231.895	0.32998	0.0982393	3.35894	0.000782424	0.0360681	RU2B			RU2B
ENSSSAG00000053711	heart	915.892	0.272207	0.0804604	3.38312	0.000716662	0.0341473	usf1	usf1		usf1	Upstream Transcription Factor 1	N
ENSSSAG00000053757	heart	468.844	-0.785053	0.198713	-3.95069	7.79e-05	0.0100859	hspe1			hspe1
ENSSSAG00000053814	heart	311.085	-1.32841	0.353807	-3.75462	0.000173603	0.015789	cyp1b1	cyp1b1		cyp1b1	Cytochrome P450 Family 1 Subfamily B Member 1	N
ENSSSAG00000053878	heart	395.936	-0.450933	0.119829	-3.76315	0.000167788	0.0154692	tmem147			tmem147
ENSSSAG00000053914	heart	267.027	1.51275	0.413289	3.66026	0.000251956	0.0189467					SLIT-ROBO Rho GTPase-activating protein 3-like
ENSSSAG00000054208	heart	79	1.58716	0.415557	3.81937	0.000133795	0.0135486	ATE1	ATE1		ATE1	Arginyltransferase 1	N
ENSSSAG00000054361	heart	273.76	-0.517927	0.13225	-3.91625	8.99e-05	0.0111062				prrc2c	proline-rich coiled-coil 2C	N
ENSSSAG00000054369	heart	878.514	0.485402	0.146367	3.31634	0.000912059	0.0389118	bi1			bi1
ENSSSAG00000054375	heart	1037.11	0.666688	0.146913	4.53799	5.68e-06	0.00249366	pno1	pno1		pno1	Partner Of NOB1 Homolog	N
ENSSSAG00000054381	heart	1193.39	0.403721	0.115115	3.50712	0.00045298	0.0261689	CTDS2	CTDS2		CTDS2		N
ENSSSAG00000054460	heart	205.033	0.776515	0.194971	3.98272	6.81e-05	0.00921686					ephrin-A1-like	N
ENSSSAG00000054579	heart	2193.46	0.327459	0.100464	3.25948	0.00111617	0.0438496	map1lc3b			map1lc3b
ENSSSAG00000054606	heart	200.837	-0.593543	0.162157	-3.66031	0.000251913	0.0189467	endog	endog		endog	Endonuclease G	N
ENSSSAG00000054675	heart	799.34	-0.525108	0.139108	-3.77483	0.000160119	0.0151248	RT31	mrps31		mrps31	Mitochondrial Ribosomal Protein S31	N
ENSSSAG00000055046	heart	702.293	0.436832	0.126676	3.44841	0.000563894	0.0290816					pituitary tumor-transforming gene 1 protein-interacting protein-like	N
ENSSSAG00000055241	heart	324.627	-0.578622	0.149058	-3.88187	0.000103657	0.0118227	foxo3b			foxo3b
ENSSSAG00000055580	heart	84.2896	-0.818597	0.181238	-4.51668	6.28e-06	0.00256222		kpna6		kpna6	Karyopherin Subunit Alpha 6	N
ENSSSAG00000055845	heart	443.299	0.38725	0.118319	3.27294	0.00106436	0.0427922					TBC1 domain family member 15
ENSSSAG00000055890	heart	382.612	-0.790992	0.191325	-4.13429	3.56e-05	0.00689581	timm44	timm44		timm44	Translocase Of Inner Mitochondrial Membrane 44	N
ENSSSAG00000055922	heart	386.792	0.326727	0.0931404	3.5079	0.000451666	0.0261689	yipf3	yipf3		yipf3	Yip1 Domain Family Member 3	N
ENSSSAG00000056079	heart	752.934	-0.552192	0.146083	-3.78	0.000156831	0.0149189	cenpq			cenpq
ENSSSAG00000056138	heart	146.61	1.07379	0.334928	3.20603	0.0013458	0.0487623	epb41l4a			epb41l4a
ENSSSAG00000056390	heart	202.136	-0.483252	0.14813	-3.26234	0.00110497	0.0436811	TMEM69			TMEM69
ENSSSAG00000056400	heart	2672.46	0.500296	0.140761	3.55422	0.000379097	0.0234613	tnip1	tnip1		tnip1	TNFAIP3 Interacting Protein 1	N
ENSSSAG00000056402	heart	3869.35	0.318818	0.0762087	4.18348	2.87e-05	0.00598951					60S ribosomal protein L32	N
ENSSSAG00000056533	heart	8106.53	-0.739712	0.185293	-3.99213	6.55e-05	0.0089486					citrate synthase, mitochondrial	N
ENSSSAG00000057006	heart	7562.37	0.314988	0.079997	3.9375	8.23e-05	0.0104062	rpl31	rpl31		rpl31	Ribosomal Protein L31	N
ENSSSAG00000057017	heart	1480.27	0.809486	0.199044	4.06686	4.77e-05	0.00796765			MATR3	MATR3	matrin-3	N
ENSSSAG00000057121	heart	656.055	-0.797857	0.242245	-3.29359	0.000989155	0.040655					ectonucleotide pyrophosphatase/phosphodiesterase family member 2
ENSSSAG00000057291	heart	192.266	-1.05745	0.250732	-4.21745	2.47e-05	0.00573424	lpin1a	lpin1		lpin1	Lipin 1	N
ENSSSAG00000057301	heart	103.061	-0.489908	0.145985	-3.35589	0.00079111	0.0360697	NUP214			NUP214
ENSSSAG00000057658	heart	53.1873	1.42675	0.343563	4.15281	3.28e-05	0.00654914	zgc:162297	zgc:162297		zgc:162297		N
ENSSSAG00000057674	heart	940.876	0.826156	0.201737	4.09522	4.22e-05	0.00742123	t53i2	t53i2		t53i2		N
ENSSSAG00000057845	heart	177.003	0.603957	0.161914	3.73011	0.000191397	0.0164524					GATA zinc finger domain-containing protein 1	N
ENSSSAG00000057925	heart	531.51	-0.392351	0.117007	-3.35323	0.000798757	0.0361922				osbp	oxysterol binding protein
ENSSSAG00000058011	heart	617.425	-0.426699	0.0854623	-4.99284	5.95e-07	0.000593241	DMXL1	DMXL1		DMXL1	Dmx Like 1	N
ENSSSAG00000058071	heart	775.651	0.449205	0.140577	3.19543	0.00139625	0.0491351	PDCL3			PDCL3
ENSSSAG00000058131	heart	288.172	-0.409057	0.12638	-3.23673	0.00120909	0.0455665	PDK1			PDK1
ENSSSAG00000058526	heart	71.6809	-0.517446	0.145627	-3.55323	0.000380536	0.0234642					zinc finger protein 710-like	N
ENSSSAG00000058582	heart	148.392	0.451532	0.121365	3.72043	0.00019888	0.0166275	cluap1	cluap1		cluap1	Clusterin Associated Protein 1	N
ENSSSAG00000058620	heart	799.257	-0.698146	0.182139	-3.83304	0.000126571	0.0131561	cluha			cluha
ENSSSAG00000058859	heart	362.913	-0.883458	0.24946	-3.54148	0.000397892	0.0242019	ADAMTS15			ADAMTS15
ENSSSAG00000059009	heart	538.433	0.787234	0.178596	4.4079	1.04e-05	0.00330584	bccip	bccip		bccip	BRCA2 And CDKN1A Interacting Protein	N
ENSSSAG00000059116	heart	60.1921	-0.633678	0.181136	-3.49835	0.00046815	0.026645					no match
ENSSSAG00000059155	heart	310.442	0.319109	0.0870871	3.66426	0.000248059	0.0188644	bmal2	arntl2		arntl2		N
ENSSSAG00000059242	heart	1078.29	0.805192	0.195736	4.11366	3.89e-05	0.00713728					polyadenylate-binding protein-interacting protein 2	N
ENSSSAG00000059264	filet	23.1272	2.49859	0.435837	5.73285	9.88e-09	0.000317591			frrs1	frrs1	putative ferric-chelate reductase 1	N
ENSSSAG00000059264	heart	88.4392	8.32758	1.06054	7.8522	4.09e-15	1.1e-10			frrs1	frrs1	putative ferric-chelate reductase 1	N
ENSSSAG00000059290	heart	575.35	-0.628727	0.194264	-3.23646	0.00121021	0.0455665	wscd2			wscd2
ENSSSAG00000059346	heart	929.194	0.515823	0.154444	3.33988	0.000838143	0.0372526					sugar phosphate exchanger 3-like
ENSSSAG00000059489	heart	378.327	0.391648	0.115426	3.39306	0.000691169	0.0331675					TBC1 domain family member 15
ENSSSAG00000059816	heart	4292	-1.30859	0.334881	-3.90763	9.32e-05	0.0111826	HEM1	HEM1		HEM1	5-aminolevulinate synthase	N
ENSSSAG00000059838	heart	2445.5	-0.790996	0.232387	-3.40379	0.000664572	0.0324699	oxct1a	oxct1a		oxct1a	3-Oxoacid CoA-Transferase 1	N
ENSSSAG00000060046	heart	1414.98	0.620581	0.15884	3.90697	9.35e-05	0.0111826	m4a8a	m4a8a		m4a8a		N
ENSSSAG00000060254	heart	120.825	-1.00189	0.27324	-3.66671	0.000245687	0.0187901					no match
ENSSSAG00000061085	heart	251.993	-0.464494	0.118351	-3.92471	8.68e-05	0.0108227					E3 ubiquitin-protein ligase MARCHF6-like	N
ENSSSAG00000061233	heart	465.267	0.772683	0.203275	3.80118	0.000144008	0.0141491	ubald1b			ubald1b
ENSSSAG00000061401	heart	982.721	-0.891436	0.242705	-3.67291	0.0002398	0.0185508	c1qbp	c1qbp		c1qbp	Complement C1q Binding Protein	N
ENSSSAG00000061679	heart	720.878	-0.533853	0.149488	-3.5712	0.000355348	0.0225041	HIPK3			HIPK3
ENSSSAG00000062181	heart	36881.5	-1.02445	0.292409	-3.50347	0.000459235	0.0264734	ACTA1	ACTA1		ACTA1	Actin Alpha 1, Skeletal Muscle	N
ENSSSAG00000062197	heart	2908.8	-0.563847	0.176342	-3.19747	0.00138639	0.0491351	pgk			pgk
ENSSSAG00000062498	heart	79.4177	-0.838406	0.183839	-4.56054	5.1e-06	0.00240973	mfsd2b			mfsd2b
ENSSSAG00000062741	heart	17906.6	0.374206	0.107092	3.49425	0.0004754	0.0269437	rps14	rps14		rps14	Ribosomal Protein S14	N
ENSSSAG00000062787	heart	210.021	1.07507	0.308566	3.48407	0.000493842	0.0273548	zgc:162608			zgc:162608
ENSSSAG00000062905	heart	399.734	-1.09094	0.265299	-4.1121	3.92e-05	0.00713728					high affinity cationic amino acid transporter 1-like	N
ENSSSAG00000062986	heart	129.044	-0.581974	0.176282	-3.30138	0.000962122	0.0400949					prolyl endopeptidase
ENSSSAG00000063047	heart	239.434	-0.490754	0.110962	-4.42272	9.75e-06	0.00323747					ski oncogene-like
ENSSSAG00000063294	heart	65.6388	2.29766	0.670796	3.42528	0.000614172	0.0306755					B-cadherin
ENSSSAG00000063366	heart	419.203	0.293774	0.0822659	3.57104	0.000355572	0.0225041	spout1			spout1
ENSSSAG00000063381	heart	245.161	-0.409584	0.125719	-3.25794	0.00112226	0.0438496					ensconsin-like
ENSSSAG00000063394	heart	636.414	0.334559	0.0935806	3.57509	0.000350102	0.0225041	CYB5	cyb5a		cyb5a	Cytochrome B5 Type A	N
ENSSSAG00000063477	heart	82.8699	-0.853563	0.136155	-6.26906	3.63e-10	1.63e-06	wars2	wars2		wars2	Tryptophanyl TRNA Synthetase 2, Mitochondrial	N
ENSSSAG00000063841	heart	255.179	-0.413281	0.120956	-3.41679	0.00063365	0.0313	vapb			vapb
ENSSSAG00000063913	heart	2404.25	0.663813	0.203721	3.25844	0.00112026	0.0438496	DDX21			DDX21
ENSSSAG00000063954	heart	8200.07	-0.75958	0.211127	-3.59773	0.000321001	0.021635	immt	immt		immt	Inner Membrane Mitochondrial Protein	N
ENSSSAG00000063964	heart	805.205	-0.729631	0.146636	-4.97578	6.5e-07	0.000607004					reticulon-4-interacting protein 1 homolog, mitochondrial-like	N
ENSSSAG00000063977	heart	1739.6	-0.725428	0.192515	-3.76817	0.000164447	0.0153186	abhd18	abhd18		abhd18	Abhydrolase Domain Containing 18	N
ENSSSAG00000063978	heart	117.699	0.791905	0.237721	3.33123	0.000864619	0.0377876				mamdc4	MAM domain containing 4
ENSSSAG00000064168	heart	4388.98	0.459609	0.120727	3.807	0.000140663	0.013922	gtpbp4	gtpbp4		gtpbp4	GTP Binding Protein 4	N
ENSSSAG00000064277	heart	218.959	-0.67115	0.166979	-4.01937	5.84e-05	0.00854501	CHP1	chp1		chp1	Calcineurin Like EF-Hand Protein 1	N
ENSSSAG00000064317	heart	11879.8	0.333579	0.0994919	3.35283	0.00079991	0.0361922				rs11	40S ribosomal protein S11
ENSSSAG00000064442	heart	1118.05	-0.993338	0.22121	-4.49048	7.11e-06	0.00262064	got2a	got2a		got2a	Glutamic-Oxaloacetic Transaminase 2	N
ENSSSAG00000064447	heart	210.032	0.394146	0.111891	3.52258	0.000427366	0.0253976	entr1			entr1
ENSSSAG00000064590	heart	396.081	-0.735468	0.175218	-4.19745	2.7e-05	0.00594797	pparab			pparab
ENSSSAG00000064636	heart	1605.9	0.433808	0.106842	4.06025	4.9e-05	0.00809605				lyg	Lysozyme g	N
ENSSSAG00000064659	heart	650.439	-0.299391	0.092293	-3.24392	0.00117897	0.0449109	ANKHD1			ANKHD1
ENSSSAG00000064699	heart	136.124	-0.578399	0.142985	-4.04517	5.23e-05	0.0083427	CCDC9	CCDC9		CCDC9	Coiled-Coil Domain Containing 9	N
ENSSSAG00000064884	heart	138.099	-1.82476	0.456361	-3.9985	6.37e-05	0.00880045	chordc1a	chordc1a		chordc1a	Cysteine And Histidine Rich Domain Containing 1	N
ENSSSAG00000064919	heart	1729.18	1.32677	0.234982	5.64628	1.64e-08	3.68e-05	gamt	gamt		gamt	Guanidinoacetate N-Methyltransferase	N
ENSSSAG00000065062	heart	338.904	0.405898	0.120435	3.37026	0.000750983	0.0350993					solute carrier family 26 member 9
ENSSSAG00000065211	heart	1105.86	0.38095	0.107628	3.53951	0.000400871	0.0243059	lrrc47	lrrc47		lrrc47	Leucine Rich Repeat Containing 47	N
ENSSSAG00000065311	heart	248.187	-0.857043	0.233098	-3.67675	0.000236224	0.0183797				suco	SUN domain containing ossification factor
ENSSSAG00000065319	heart	756.951	-0.620095	0.169596	-3.65631	0.000255873	0.0191465	pmpca			pmpca
ENSSSAG00000065470	heart	1120.46	0.422202	0.101004	4.18004	2.91e-05	0.00598951	mgat2	mgat2		mgat2	Alpha-1,6-Mannosyl-Glycoprotein 2-Beta-N-Acetylglucosaminyltransferase	N
ENSSSAG00000065815	heart	1234.17	0.699834	0.196979	3.55283	0.000381105	0.0234642					forkhead box protein K2-like
ENSSSAG00000065903	heart	169.561	-0.56568	0.132798	-4.25972	2.05e-05	0.0050094	ube3c	ube3c		ube3c	Ubiquitin Protein Ligase E3C	N
ENSSSAG00000065996	heart	1097.29	1.61934	0.329886	4.90878	9.16e-07	0.000819804			zgc:73226	zgc:73226	Salmo salar uncharacterized protein LOC402792 homolog (zgc:73226)	N
ENSSSAG00000066053	heart	14566.2	0.402958	0.114806	3.50989	0.000448293	0.0261223	rpl30	RL30		RL30		N
ENSSSAG00000066193	heart	373.119	0.457659	0.127046	3.60232	0.00031539	0.0213332					retinoic acid receptor alpha	N
ENSSSAG00000066243	heart	412.923	0.387599	0.109157	3.55084	0.000384005	0.0235485					DNA-directed RNA polymerase II subunit RPB9
ENSSSAG00000066339	heart	1413.14	-1.79155	0.541552	-3.30817	0.000939077	0.0396252		slc2a1b		slc2a1b	Solute Carrier Family 2 Member 1	N
ENSSSAG00000066383	heart	506.786	-0.596039	0.182845	-3.25981	0.00111487	0.0438496	GPT			GPT
ENSSSAG00000066482	heart	543.063	0.506584	0.156793	3.2309	0.00123401	0.045885	nmd3			nmd3
ENSSSAG00000066580	heart	6499.04	0.361264	0.0994728	3.63179	0.000281464	0.0199929				rps16	ribosomal protein S16	N
ENSSSAG00000066581	heart	116.843	0.693661	0.214265	3.2374	0.00120625	0.0455449	clec3ba			clec3ba
ENSSSAG00000066800	heart	43.5273	-0.950235	0.288167	-3.29752	0.000975445	0.0402946	ACSF3			ACSF3
ENSSSAG00000066854	heart	2352.64	-0.370186	0.110832	-3.34006	0.000837608	0.0372526	HECTD1			HECTD1
ENSSSAG00000067039	heart	1192.14	-0.321832	0.0808714	-3.97955	6.9e-05	0.00923826	GLG1			GLG1
ENSSSAG00000067109	heart	86.3197	1.3593	0.344452	3.94627	7.94e-05	0.0101759		gramd1ba		gramd1ba		N
ENSSSAG00000067160	heart	11879.9	-0.712966	0.143322	-4.97458	6.54e-07	0.000607004					sarcoplasmic/endoplasmic reticulum calcium ATPase 2-like	N
ENSSSAG00000067730	heart	122.51	-0.489668	0.14018	-3.49314	0.000477368	0.0269984	casd1			casd1
ENSSSAG00000067808	heart	707.251	-0.993554	0.216061	-4.5985	4.26e-06	0.00212148					5-aminolevulinate synthase, nonspecific, mitochondrial-like	N
ENSSSAG00000067926	heart	13856.3	0.396924	0.0961341	4.12886	3.65e-05	0.00696802	rpl19	rpl19		rpl19	Ribosomal Protein L19	N
ENSSSAG00000068011	heart	215.162	0.959535	0.268456	3.57427	0.000351202	0.0225041	tmsb1	tmsb1		tmsb1		N
ENSSSAG00000068030	heart	225.553	-0.655814	0.162908	-4.02567	5.68e-05	0.00854501	mettl8			mettl8
ENSSSAG00000068056	heart	86.7242	-1.07868	0.302282	-3.56845	0.000359097	0.0225344	DPYSL2	DPYSL2		DPYSL2	Dihydropyrimidinase Like 2	N
ENSSSAG00000068210	heart	297.792	-0.718723	0.191911	-3.74508	0.000180334	0.0159622	cstf1	cstf1		cstf1	cleavage stimulation factor subunit 1	N
ENSSSAG00000068214	heart	512.642	0.412013	0.122758	3.3563	0.00078994	0.0360697	slc7a6os	slc7a6os		slc7a6os	Solute Carrier Family 7 Member 6 Opposite Strand	N
ENSSSAG00000068438	heart	1054.87	0.410742	0.116534	3.52465	0.000424049	0.0253123	fam50a			fam50a
ENSSSAG00000068507	heart	130.111	-0.91879	0.188393	-4.87698	1.08e-06	0.000850856					patatin-like phospholipase domain-containing protein 7	N
ENSSSAG00000068519	heart	222.992	0.334025	0.0950118	3.51562	0.000438735	0.0258541					ectonucleoside triphosphate diphosphohydrolase 2-like
ENSSSAG00000068534	heart	2964.09	-0.683108	0.159515	-4.2824	1.85e-05	0.00476557					sodium- and chloride-dependent taurine transporter-like	N
ENSSSAG00000068636	heart	334.796	0.84396	0.237244	3.55735	0.000374612	0.0232371		pts		pts	6-Pyruvoyltetrahydropterin Synthase	N
ENSSSAG00000068846	heart	325.445	-2.46799	0.613001	-4.02608	5.67e-05	0.00854501					C-type natriuretic peptide 3-like	N
ENSSSAG00000068907	heart	306.604	-0.619879	0.169155	-3.66456	0.000247768	0.0188644		dqx1		dqx1	DEAQ-Box RNA Dependent ATPase 1	N
ENSSSAG00000068953	heart	190.941	0.811519	0.197595	4.10698	4.01e-05	0.00719449	STMN1	stmn1b		stmn1b	Stathmin 1	N
ENSSSAG00000068990	heart	796.832	-0.770639	0.190965	-4.03551	5.45e-05	0.00854501	unc45a	unc45a		unc45a	Unc-45 Myosin Chaperone A	N
ENSSSAG00000069098	heart	369.583	0.363197	0.0885687	4.10074	4.12e-05	0.00734227	steep1			steep1
ENSSSAG00000069346	ADMs	167.464	-0.876341	0.197675	-4.43324	9.28e-06	0.0262478	SCARA5	SCARA5		SCARA5	Scavenger Receptor Class A Member 5	N
ENSSSAG00000069474	heart	225.239	-0.421836	0.126571	-3.3328	0.000859771	0.0377584	gatb			gatb
ENSSSAG00000069481	heart	597.468	-0.55931	0.146247	-3.82443	0.000131075	0.0134682		nhlrc2		nhlrc2	NHL Repeat Containing 2	N
ENSSSAG00000069487	heart	528.962	-0.437213	0.13471	-3.24558	0.00117212	0.0448218	coq5			coq5
ENSSSAG00000069505	heart	4722.09	0.371788	0.0888203	4.18584	2.84e-05	0.00597537		btf3		btf3	Basic Transcription Factor 3	N
ENSSSAG00000069593	heart	26737	0.341055	0.105157	3.24329	0.00118157	0.0449109	RPS3A			RPS3A
ENSSSAG00000069620	heart	9037.81	-0.670516	0.201075	-3.33465	0.000854057	0.0376919		nnt2		nnt2		N
ENSSSAG00000069678	heart	441.424	-0.944667	0.243778	-3.87512	0.000106574	0.0120045					G elongation factor, mitochondrial 1	N
ENSSSAG00000069687	heart	768.758	-0.544385	0.155448	-3.50203	0.00046173	0.0265037	cluha			cluha
ENSSSAG00000069706	heart	153.797	-1.72776	0.471639	-3.6633	0.000248986	0.0188816	CP1A1	CP1A1		CP1A1	Cytochrome P450 Family 1 Subfamily A Member 1	N
ENSSSAG00000069717	heart	337.629	-0.817201	0.169784	-4.81317	1.49e-06	0.000952219	gfm2	gfm2		gfm2	GTP Dependent Ribosome Recycling Factor Mitochondrial 2	N
ENSSSAG00000069915	heart	677.296	-0.702746	0.196579	-3.57487	0.000350403	0.0225041	cox10	cox10		cox10	Cytochrome C Oxidase Assembly Factor Heme A:Farnesyltransferase COX10	N
ENSSSAG00000070043	heart	195.665	0.777836	0.237443	3.27588	0.00105333	0.0425139	eapp			eapp
ENSSSAG00000070163	heart	479.6	0.96124	0.289888	3.3159	0.000913496	0.0389118					cytochrome P450 2F3-like	N
ENSSSAG00000070225	heart	83.2021	0.983288	0.23462	4.19099	2.78e-05	0.00594797	RAPGEF4			RAPGEF4
ENSSSAG00000070305	heart	743.873	0.509445	0.108895	4.67833	2.89e-06	0.00152666	hmgb1b	hmgb1b		hmgb1b	High Mobility Group Box 1	N
ENSSSAG00000070361	heart	287.44	0.513022	0.141746	3.6193	0.000295397	0.0205488	zfand1			zfand1
ENSSSAG00000070598	heart	678.79	-0.43265	0.130389	-3.31814	0.000906181	0.0387227	supt6h			supt6h
ENSSSAG00000071028	heart	1089.14	-0.65616	0.201232	-3.26072	0.0011113	0.0438496					T-complex protein 1 subunit zeta
ENSSSAG00000071145	heart	139.575	-0.5793	0.168154	-3.44505	0.000570946	0.0293329			hook3	hook3	hook microtubule-tethering protein 3	N
ENSSSAG00000071151	heart	126.708	0.890691	0.243722	3.65453	0.000257649	0.0192138	clec14a	clec14a		clec14a	C-Type Lectin Domain Containing 14A	N
ENSSSAG00000071289	heart	138.818	-1.55842	0.426908	-3.65049	0.000261743	0.0194115	FRMD3	frmd3		frmd3	FERM Domain Containing 3	N
ENSSSAG00000071363	heart	316.054	0.487335	0.121443	4.01288	6e-05	0.00872864	imp4	imp4		imp4	IMP U3 Small Nucleolar Ribonucleoprotein 4	N
ENSSSAG00000071484	heart	586.828	0.33288	0.0800373	4.15906	3.2e-05	0.00641993	psd7			psd7
ENSSSAG00000071490	heart	704.892	-0.928832	0.249257	-3.7264	0.000194232	0.0165053	akap1b			akap1b
ENSSSAG00000071509	heart	3296.78	-1.02401	0.30588	-3.34776	0.000814687	0.0365536	pkma	pkma		pkma	Pyruvate Kinase M1/2	N
ENSSSAG00000071544	heart	200.87	-0.661071	0.16448	-4.01917	5.84e-05	0.00854501	vars2	vars2		vars2	Valyl-TRNA Synthetase 2, Mitochondrial	N
ENSSSAG00000071572	heart	199.663	-0.634073	0.183501	-3.45542	0.000549446	0.0290032					major facilitator superfamily domain-containing protein 3	N
ENSSSAG00000071672	heart	689.117	0.454054	0.125731	3.6113	0.000304665	0.0208021		mrto4		mrto4	MRT4 Homolog, Ribosome Maturation Factor	N
ENSSSAG00000071711	heart	229.197	-0.295415	0.090827	-3.2525	0.00114395	0.0443111	nsun4			nsun4
ENSSSAG00000072044	heart	55.1633	0.753369	0.223042	3.3777	0.000730952	0.034402	rps28	rps28		rps28	Ribosomal Protein S28	N
ENSSSAG00000072189	heart	11278.2	0.409421	0.10319	3.96763	7.26e-05	0.00957934	RPL35	RPL35		RPL35	Ribosomal Protein L35	N
ENSSSAG00000072228	heart	432.249	0.324273	0.09916	3.2702	0.00107471	0.042948	phf10			phf10
ENSSSAG00000072230	heart	686.314	0.418155	0.115716	3.61364	0.00030193	0.0207275	rab25b			rab25b
ENSSSAG00000072497	heart	35.0384	-0.948017	0.27376	-3.46295	0.000534288	0.0286807					disintegrin and metalloproteinase domain-containing protein 10	N
ENSSSAG00000072585	heart	360.721	-0.757637	0.168088	-4.50738	6.56e-06	0.00257812	ACSF3	acsf3		acsf3	Acyl-CoA Synthetase Family Member 3	N
ENSSSAG00000072688	heart	197.658	-0.512445	0.137822	-3.71818	0.000200666	0.0167248	cemip2			cemip2
ENSSSAG00000072689	heart	375.803	0.358921	0.111085	3.23104	0.0012334	0.045885	vma21			vma21
ENSSSAG00000072705	heart	5600	-0.708881	0.195947	-3.61771	0.000297216	0.0205589	aifm1	aifm1		aifm1	Apoptosis Inducing Factor Mitochondria Associated 1	N
ENSSSAG00000072739	heart	1484.4	0.417104	0.104837	3.97861	6.93e-05	0.00923826	fam32a	fam32a		fam32a	Family With Sequence Similarity 32 Member A	N
ENSSSAG00000072788	heart	200.947	-0.612365	0.162721	-3.76328	0.000167698	0.0154692	ppcs	ppcs		ppcs	Phosphopantothenoylcysteine Synthetase	N
ENSSSAG00000072859	heart	241.509	0.593744	0.138344	4.29179	1.77e-05	0.00471275	mepcea	mepce		mepce	Methylphosphate Capping Enzyme	N
ENSSSAG00000072870	heart	694.65	0.441383	0.126435	3.49098	0.000481259	0.0270479	ddx49	ddx49		ddx49	DEAD-Box Helicase 49	N
ENSSSAG00000072884	heart	6491.68	0.422001	0.121937	3.46081	0.000538557	0.0286807					ubiquitin-60S ribosomal protein L40
ENSSSAG00000073094	heart	1182.29	-0.732673	0.162712	-4.50289	6.7e-06	0.00257812					dynamin-like 120 kDa protein, mitochondrial	N
ENSSSAG00000073121	heart	786.72	-0.435044	0.121792	-3.57203	0.000354223	0.0225041	loxl2b	loxl2b		loxl2b	Lysyl Oxidase Like 2	N
ENSSSAG00000073280	heart	391.472	-2.0005	0.527928	-3.78934	0.000151047	0.0145747	klf15	klf15		klf15	KLF Transcription Factor 15	N
ENSSSAG00000073378	heart	60.1081	-0.931614	0.27242	-3.41977	0.000626737	0.0311298	PIGN	PIGN		PIGN	Phosphatidylinositol Glycan Anchor Biosynthesis Class N	N
ENSSSAG00000073472	heart	129.708	2.26799	0.611884	3.70657	0.000210087	0.0170166		si:ch73-206d17.1		si:ch73-206d17.1		N
ENSSSAG00000073512	heart	851.02	0.477864	0.122292	3.90757	9.32e-05	0.0111826					protein CWC15 homolog
ENSSSAG00000073537	heart	440.064	-1.04557	0.267768	-3.90476	9.43e-05	0.0112354					protein phosphatase Slingshot homolog 2	N
ENSSSAG00000073570	heart	490.425	-0.479922	0.141301	-3.39646	0.000682631	0.032993	mtif2			mtif2
ENSSSAG00000073619	heart	590.841	0.639679	0.155654	4.10962	3.96e-05	0.00716054	bloc1s1	bloc1s1		bloc1s1	Biogenesis Of Lysosomal Organelles Complex 1 Subunit 1	N
ENSSSAG00000073777	heart	18853.5	0.29678	0.0909694	3.26242	0.00110466	0.0436811					40S ribosomal protein S5
ENSSSAG00000073793	heart	1513.63	0.511046	0.125001	4.08832	4.35e-05	0.00749825	rcc2	rcc2		rcc2	Regulator Of Chromosome Condensation 2	N
ENSSSAG00000073900	heart	290.805	0.400562	0.122525	3.26922	0.00107845	0.042948	fa44b			fa44b
ENSSSAG00000073978	heart	61.0321	-2.04475	0.424584	-4.81588	1.47e-06	0.000952219		slc24a4b		slc24a4b	Solute Carrier Family 24 Member 4	N
ENSSSAG00000074122	heart	451.489	-0.3485	0.104093	-3.34797	0.000814054	0.0365536	PNPT1			PNPT1
ENSSSAG00000074202	heart	195.171	-0.816	0.206761	-3.94659	7.93e-05	0.0101759					chromodomain-helicase-DNA-binding protein 6-like
ENSSSAG00000074237	heart	290.45	0.434664	0.119646	3.63293	0.000280219	0.0199929	napaa	napa		napa	NSF Attachment Protein Alpha	N
ENSSSAG00000074349	heart	3042.77	-0.755869	0.209691	-3.60467	0.000312548	0.0211942					protein unc-45 homolog B-like
ENSSSAG00000074353	heart	858.784	-0.498384	0.152377	-3.27074	0.00107266	0.042948	ndufs6			ndufs6
ENSSSAG00000074489	heart	1863.16	-1.20328	0.220722	-5.45155	4.99e-08	8.96e-05	lrpprc	LRPPRC		LRPPRC	Leucine Rich Pentatricopeptide Repeat Containing	N
ENSSSAG00000074536	heart	92.5578	-0.963136	0.258661	-3.72354	0.00019645	0.0165053	adck1	adck1		adck1	AarF Domain Containing Kinase 1	N
ENSSSAG00000074553	heart	12763.4	0.354154	0.105251	3.36484	0.00076587	0.0356712	rps24	RS24		RS24		N
ENSSSAG00000074712	heart	806.723	-0.680934	0.197798	-3.44257	0.000576206	0.0295468	si:ch211-215a10.4	si:ch211-215a10.4		si:ch211-215a10.4		N
ENSSSAG00000074760	heart	521.954	-0.615975	0.164889	-3.73569	0.000187203	0.0162449	sec31a	sec31a		sec31a	SEC31 Homolog A, COPII Coat Complex Component	N
ENSSSAG00000074820	heart	891.316	-0.592322	0.111758	-5.30005	1.16e-07	0.000164034	aurkaip1	aurkaip1		aurkaip1	Aurora Kinase A Interacting Protein 1	N
ENSSSAG00000074951	heart	182.666	-0.386812	0.108368	-3.56942	0.000357778	0.0225041					neurofibromin
ENSSSAG00000075053	heart	136.146	-0.463812	0.135713	-3.4176	0.000631762	0.0312641					transcriptional repressor p66-beta
ENSSSAG00000075257	heart	208.858	0.766132	0.221919	3.4523	0.000555822	0.0290325	psme3	psme3		psme3	Proteasome Activator Subunit 3	N
ENSSSAG00000075399	heart	8223.55	0.403843	0.0939557	4.29822	1.72e-05	0.00468186	RPL35	RPL35		RPL35	Ribosomal Protein L35	N
ENSSSAG00000075415	heart	1011.68	-0.604334	0.181503	-3.32961	0.00086968	0.0378846	PPIF	PPIF		PPIF	Peptidylprolyl Isomerase F	N
ENSSSAG00000075495	heart	123.222	0.948685	0.290716	3.26326	0.00110137	0.0436671					leucine zipper protein 2-like
ENSSSAG00000075534	heart	424.859	-0.503882	0.144478	-3.4876	0.000487369	0.0271645					receptor-type tyrosine-protein phosphatase gamma
ENSSSAG00000075653	heart	1203.84	0.499623	0.143773	3.47509	0.000510688	0.0279436	psmd9			psmd9
ENSSSAG00000075700	heart	593.51	-0.391879	0.0970979	-4.03592	5.44e-05	0.00854501	prpf40a	prpf40a		prpf40a	Pre-MRNA Processing Factor 40 Homolog A	N
ENSSSAG00000075718	heart	1993.96	1.08709	0.335046	3.24461	0.00117612	0.0449109					protein-L-isoaspartate O-methyltransferase domain-containing protein 2-like
ENSSSAG00000075809	heart	341.838	0.468943	0.129617	3.61791	0.000296993	0.0205589					tRNA selenocysteine 1-associated protein 1-like	N
ENSSSAG00000075872	heart	611.089	-0.458234	0.139657	-3.28114	0.00103388	0.0421077	dnajc11a			dnajc11a
ENSSSAG00000076008	heart	349.949	-0.429978	0.126147	-3.40853	0.00065313	0.0320856				sec24c	SEC24 homolog C, COPII coat complex component
ENSSSAG00000076164	heart	245.629	0.45523	0.13172	3.45604	0.000548174	0.0290032	thap12b			thap12b
ENSSSAG00000076210	heart	680.01	-0.487745	0.126931	-3.84261	0.000121734	0.0129534		tnrc6c2		tnrc6c2		N
ENSSSAG00000076226	heart	132.662	0.457103	0.127129	3.59558	0.000323668	0.0217293				klhl11	kelch-like family member 11
ENSSSAG00000076264	heart	127.372	-0.760583	0.190015	-4.00276	6.26e-05	0.00877817	aacs			aacs
ENSSSAG00000076360	heart	111.421	0.520905	0.15221	3.42227	0.000620997	0.0309018	zbtb14			zbtb14
ENSSSAG00000076685	heart	411.463	-0.76134	0.210136	-3.62308	0.000291116	0.0203562		cep85		cep85	Centrosomal Protein 85	N
ENSSSAG00000076707	heart	11549.7	0.385657	0.0993738	3.88087	0.000104082	0.0118227	rl26	rl26		rl26		N
ENSSSAG00000076834	heart	902.376	0.48613	0.124805	3.89511	9.82e-05	0.0114399	ephx1	ephx1		ephx1	Epoxide Hydrolase 1	N
ENSSSAG00000076849	heart	285.037	0.370612	0.105518	3.51231	0.000444227	0.0259681					small integral membrane protein 19
ENSSSAG00000076968	heart	3043.59	-0.729382	0.196847	-3.70533	0.00021112	0.0170166	samm50l	samm50l		samm50l	SAMM50 Sorting And Assembly Machinery Component	N
ENSSSAG00000076994	heart	410.082	1.50461	0.438168	3.43386	0.000595052	0.0301763	TNNT2	tnnt2b		tnnt2b		N
ENSSSAG00000077051	heart	172.358	1.46566	0.363279	4.03454	5.47e-05	0.00854501		tulp1b		tulp1b	TUB Like Protein 1	N
ENSSSAG00000077252	heart	96.4118	-1.73722	0.274369	-6.33169	2.42e-10	1.63e-06					sortilin	N
ENSSSAG00000077290	heart	4636.56	-0.904099	0.259482	-3.48424	0.00049354	0.0273548	cs	cs		cs	Citrate Synthase	N
ENSSSAG00000077443	heart	314.465	-0.670134	0.196963	-3.40234	0.000668116	0.032584	mgll	mgll		mgll	Monoglyceride Lipase	N
ENSSSAG00000077463	heart	3408.62	0.254846	0.0754374	3.37825	0.000729494	0.0343935	if3ei			if3ei
ENSSSAG00000077522	heart	567.474	0.354623	0.11082	3.2	0.00137427	0.049018	NDFIP1			NDFIP1
ENSSSAG00000077528	heart	134.457	0.977679	0.190815	5.12371	3e-07	0.000346978	grk5	grk5		grk5	G Protein-Coupled Receptor Kinase 5	N
ENSSSAG00000077613	heart	747.222	0.353136	0.0926588	3.81114	0.000138325	0.013792	zgc:92907	alg13		alg13	ALG13 UDP-N-Acetylglucosaminyltransferase Subunit	N
ENSSSAG00000077735	heart	1042.31	0.475103	0.14699	3.23221	0.00122836	0.045865	uba52			uba52
ENSSSAG00000077766	heart	177.035	-1.55268	0.380254	-4.08327	4.44e-05	0.00757822					mitochondrial import inner membrane translocase subunit TIM44-like	N
ENSSSAG00000077865	heart	134.75	0.936233	0.249627	3.75052	0.000176467	0.0158068	and3	and3		and3		N
ENSSSAG00000078122	heart	686.379	-0.505752	0.144196	-3.5074	0.000452504	0.0261689					clathrin heavy chain 1
ENSSSAG00000078190	heart	867.176	0.493335	0.114007	4.32723	1.51e-05	0.00433714	nmd3	nmd3		nmd3	NMD3 Ribosome Export Adaptor	N
ENSSSAG00000078306	heart	3844.2	-1.25422	0.283915	-4.41758	9.98e-06	0.00323747	PFKP	pfkpa		pfkpa	Phosphofructokinase, Platelet	N
ENSSSAG00000078313	heart	5051.77	-1.02818	0.277593	-3.70391	0.000212304	0.0170336		slc2a1b		slc2a1b	Solute Carrier Family 2 Member 1	N
ENSSSAG00000078329	heart	19282.9	0.411597	0.10923	3.76818	0.000164444	0.0153186			rps5	rps5	ribosomal protein S5	N
ENSSSAG00000078353	heart	353.038	0.598373	0.158706	3.77032	0.000163039	0.0153186	YY1	YY1		YY1	YY1 Transcription Factor	N
ENSSSAG00000078422	heart	150.536	-0.576033	0.177302	-3.24887	0.00115863	0.0444957					protein PRRC2A
ENSSSAG00000078485	heart	662.616	-0.687325	0.19175	-3.58448	0.000337746	0.0222559	SAMC	slc25a26		slc25a26	Solute Carrier Family 25 Member 26	N
ENSSSAG00000078509	heart	285.951	0.669904	0.180333	3.71482	0.00020335	0.0168734	LRR1			LRR1
ENSSSAG00000078627	heart	33.1846	1.68388	0.426921	3.94425	8.01e-05	0.0102136			dnaaf2		kelch domain-containing protein 1-like	N
ENSSSAG00000078630	heart	1829.1	0.521974	0.143556	3.63603	0.000276874	0.0198766	ctdsp2	CTDS2		CTDS2		N
ENSSSAG00000078654	heart	132.191	-0.584246	0.180435	-3.23799	0.00120375	0.0455142	sema4ba			sema4ba
ENSSSAG00000078738	heart	5673.12	-0.53785	0.155416	-3.4607	0.00053877	0.0286807	dync1h1	dync1h1		dync1h1	Dynein Cytoplasmic 1 Heavy Chain 1	N
ENSSSAG00000078766	heart	98.9601	-0.687418	0.194742	-3.52988	0.000415743	0.0249826					Salmo salar tenascin-X	Y	XM_045709629.1
ENSSSAG00000078918	heart	803.536	0.317675	0.0939386	3.38173	0.000720303	0.0341998	tbca			tbca
ENSSSAG00000079179	heart	4183.92	-0.677377	0.193393	-3.50259	0.000460765	0.0265037					solute carrier family 12 member 7-like	N
ENSSSAG00000079401	heart	400.896	0.531397	0.141317	3.76032	0.000169698	0.0155919	PDCL3	PDCL3		PDCL3	Phosducin Like 3	N
ENSSSAG00000079517	heart	883.802	-0.564974	0.162702	-3.47245	0.000515724	0.0281404	kif1b			kif1b
ENSSSAG00000079537	heart	384.171	-0.442414	0.109936	-4.02427	5.72e-05	0.00854501					reversion-inducing cysteine-rich protein with Kazal motifs-like
ENSSSAG00000079593	heart	1186.99	0.515052	0.125258	4.11192	3.92e-05	0.00713728	atg13	atg13		atg13	Autophagy Related 13	N
ENSSSAG00000079817	heart	38.7689	-0.80586	0.250974	-3.21093	0.00132308	0.0480683	UBLCP1			UBLCP1
ENSSSAG00000079929	heart	8837.36	-0.71107	0.191602	-3.71118	0.000206293	0.0169354	SUCLA2	SUCLA2		SUCLA2	Succinate-CoA Ligase ADP-Forming Subunit Beta	N
ENSSSAG00000080069	heart	800.259	-1.45963	0.41715	-3.49905	0.000466917	0.0266311					ubiquitin carboxyl-terminal hydrolase 2
ENSSSAG00000080101	heart	628.46	0.470118	0.13309	3.53234	0.000411894	0.0248067	commd3			commd3
ENSSSAG00000080109	heart	486.477	0.316378	0.0970367	3.2604	0.00111256	0.0438496	bmi1a			bmi1a
ENSSSAG00000080138	heart	502.884	-0.329652	0.0882055	-3.73732	0.000185991	0.0162041	GCN1	gcn1		gcn1	GCN1 Activator Of EIF2AK4	N
ENSSSAG00000080211	heart	1018.52	0.291159	0.0828484	3.51436	0.000440809	0.0258541	fis1			fis1
ENSSSAG00000080215	heart	352.857	-0.678209	0.189409	-3.58067	0.000342719	0.022394	ecsit	ecsit		ecsit	ECSIT Signaling Integrator	N
ENSSSAG00000080327	heart	71.0954	-1.0238	0.287068	-3.56642	0.00036189	0.0226042	abcb9			abcb9
ENSSSAG00000080424	heart	156.187	1.24826	0.350528	3.56108	0.000369337	0.023016					Salmo salar cytokine-inducible SH2-containing protein-like	Y	XM_014131925.2
ENSSSAG00000080463	heart	526.719	0.338312	0.100801	3.35622	0.000790148	0.0360697	ndufaf3			ndufaf3
ENSSSAG00000080526	heart	307.785	-0.810841	0.252474	-3.21158	0.00132006	0.0480683					cytospin-A
ENSSSAG00000080562	heart	9832.23	0.435187	0.127091	3.42421	0.0006166	0.0307398					60S ribosomal protein L24
ENSSSAG00000080743	heart	117.291	0.860899	0.255498	3.3695	0.000753057	0.0351353		nuak2		nuak2	NUAK Family Kinase 2	N
ENSSSAG00000080773	heart	780.719	0.347432	0.10869	3.19656	0.00139079	0.0491351	ub2r1			ub2r1
ENSSSAG00000080913	heart	489.483	0.56226	0.147961	3.80007	0.000144658	0.0141612	GBRAP	GBRAP		GBRAP		N
ENSSSAG00000080982	heart	665.721	-0.601465	0.13503	-4.45431	8.42e-06	0.0028322	pi4kaa	pi4kaa		pi4kaa	Phosphatidylinositol 4-Kinase Alpha	N
ENSSSAG00000081396	heart	55.6472	-0.826849	0.244459	-3.38236	0.000718651	0.0341816	ARHGEF10L			ARHGEF10L
ENSSSAG00000081401	heart	158.809	-0.579475	0.158672	-3.65204	0.000260164	0.0193477	slc15a4	slc15a4		slc15a4	Solute Carrier Family 15 Member 4	N
ENSSSAG00000081432	heart	313.487	-1.09102	0.323123	-3.37648	0.00073421	0.034495	hspd1			hspd1
ENSSSAG00000081436	heart	707.286	-0.785123	0.187799	-4.18066	2.91e-05	0.00598951					natural resistance-associated macrophage protein 2-like	N
ENSSSAG00000081441	heart	1206.76	-0.677636	0.161037	-4.20795	2.58e-05	0.0059231	hspe1			hspe1
ENSSSAG00000081486	heart	5670.99	-0.535124	0.167117	-3.2021	0.0013643	0.0489711	ndufa10			ndufa10
ENSSSAG00000081501	heart	813.242	0.587361	0.155119	3.78651	0.000152776	0.0145847		phf20a		phf20a	PHD Finger Protein 20	N
ENSSSAG00000081587	heart	885.831	0.500245	0.139342	3.59006	0.000330601	0.0219756	ID1			ID1
ENSSSAG00000081674	heart	2723.41	-0.628056	0.175886	-3.57081	0.000355884	0.0225041					cytochrome b-c1 complex subunit 1, mitochondrial
ENSSSAG00000081694	heart	106.942	-0.964921	0.2087	-4.62349	3.77e-06	0.00191663	chchd4a	chchd4a		chchd4a		N
ENSSSAG00000081711	heart	714.385	-0.866199	0.245596	-3.52693	0.000420411	0.0252069		stard13b		stard13b	StAR Related Lipid Transfer Domain Containing 13	N
ENSSSAG00000081733	heart	232.488	-1.00236	0.185891	-5.39218	6.96e-08	0.000110228	frem2b			frem2b
ENSSSAG00000081954	heart	91.1324	0.890038	0.265051	3.35798	0.000785135	0.0360693	fam110d			fam110d
ENSSSAG00000082362	heart	1451.51	0.511048	0.126261	4.04754	5.18e-05	0.0083427	anp32b	anp32b		anp32b	Acidic Nuclear Phosphoprotein 32 Family Member B	N
ENSSSAG00000082436	heart	77.6348	1.20913	0.362397	3.33647	0.000848483	0.0375074					no match
ENSSSAG00000082680	heart	165.604	0.636279	0.169562	3.7525	0.000175083	0.0158068	chrac1	chrac1		chrac1	Chromatin Accessibility Complex Subunit 1	N
ENSSSAG00000082784	heart	97.4078	0.529207	0.164303	3.22093	0.00127777	0.0468649					zinc finger protein 664
ENSSSAG00000083035	heart	32.8473	-1.17013	0.31621	-3.7005	0.000215177	0.0171206					no match
ENSSSAG00000083995	heart	86.9526	1.20915	0.366643	3.29791	0.000974091	0.0402946					no match	Y
ENSSSAG00000084142	heart	83.0245	0.530353	0.165008	3.21411	0.00130851	0.0478222					no match
ENSSSAG00000084385	heart	647.692	-0.439164	0.13404	-3.27636	0.00105156	0.0425096	si:ch211-215a10.4			si:ch211-215a10.4
ENSSSAG00000084477	heart	461.215	0.448316	0.120204	3.72964	0.000191755	0.0164524	cript	cript		cript	CXXC Repeat Containing Interactor Of PDZ3 Domain	N
ENSSSAG00000084590	heart	345.874	-0.900912	0.224701	-4.00937	6.09e-05	0.00874994	tsfm	tsfm		tsfm	Ts Translation Elongation Factor, Mitochondrial	N
ENSSSAG00000085076	heart	196.532	-0.6654	0.206123	-3.22816	0.00124588	0.046072					no match
ENSSSAG00000085160	heart	230.762	-0.56044	0.16232	-3.4527	0.000555016	0.0290325					no match
ENSSSAG00000085165	heart	962.283	-0.539882	0.161747	-3.33781	0.000844428	0.0373896	ptgesl			ptgesl
ENSSSAG00000085375	heart	541.219	0.465442	0.135634	3.4316	0.000600027	0.0301931					no match	Y
ENSSSAG00000085492	heart	104.331	-2.28323	0.496944	-4.59455	4.34e-06	0.00212279	ift70	flr		flr		N
ENSSSAG00000085520	heart	360.077	1.06969	0.292574	3.65615	0.000256035	0.0191465					no match	Y
ENSSSAG00000085644	heart	139.607	0.453003	0.134264	3.37397	0.000740932	0.0346898	zbtb14			zbtb14
ENSSSAG00000085940	heart	73.951	-1.02154	0.197251	-5.17889	2.23e-07	0.000300452	opa3	opa3		opa3	Outer Mitochondrial Membrane Lipid Metabolism Regulator OPA3	N
ENSSSAG00000086178	heart	136.628	2.81942	0.865798	3.25644	0.0011282	0.0440177					tetraspanin-8-like	N
ENSSSAG00000086209	heart	904.331	-0.54329	0.166998	-3.25327	0.00114084	0.0442939	zgc:154058			zgc:154058
ENSSSAG00000086381	heart	270.636	0.424192	0.118249	3.58726	0.000334166	0.0221034					tubulin beta-4B chain-like
ENSSSAG00000086795	heart	765.5	1.34506	0.313523	4.29014	1.79e-05	0.00471275	fbxo32	Fbxo32		Fbxo32	F-Box Protein 32	N
ENSSSAG00000087240	heart	138.212	0.804857	0.229438	3.50795	0.000451581	0.0261689	KCNS2	KCNS2		KCNS2	Potassium Voltage-Gated Channel Modifier Subfamily S Member 2	N
ENSSSAG00000087282	heart	443.13	-2.60173	0.738434	-3.5233	0.000426205	0.0253847					no match	Y
ENSSSAG00000087367	ADMs	6.864	-6.20732	1.09596	-5.66385	1.48e-08	0.000159231					no match	Y
ENSSSAG00000087587	heart	64.8025	-0.53394	0.16332	-3.26929	0.00107818	0.042948					cleavage and polyadenylation specificity factor subunit 4-like
ENSSSAG00000087718	heart	155.256	0.464977	0.134777	3.44996	0.000560665	0.0290325					UNC93-like protein MFSD11
ENSSSAG00000087860	heart	130.268	0.998929	0.302524	3.30199	0.00096003	0.0400949					receptor activity-modifying protein 3-like
ENSSSAG00000087989	heart	167.67	0.464358	0.142233	3.26477	0.00109551	0.0434989					no match
ENSSSAG00000088475	heart	78.4999	1.38189	0.236943	5.83215	5.47e-09	1.64e-05		gas2a		gas2a		N
ENSSSAG00000088515	heart	209.047	0.589096	0.108975	5.4058	6.45e-08	0.000108557					oocyte zinc finger protein XlCOF6-like	N
ENSSSAG00000089520	stomach	28.258	5.8183	1.22576	4.7467	2.07e-06	0.0171803					protein BUD31 homolog	N
ENSSSAG00000089659	heart	51.6856	-2.12668	0.658645	-3.22888	0.00124276	0.046036					no match
ENSSSAG00000089669	heart	180.578	-0.630498	0.167263	-3.7695	0.000163572	0.0153186					transcriptional coactivator YAP1
ENSSSAG00000090080	ADMs	148.524	-4.97348	1.09731	-4.53242	5.83e-06	0.0233075					no match
ENSSSAG00000090248	heart	3025.15	0.88718	0.201013	4.41354	1.02e-05	0.00325913	c209e	c209e		c209e		N
ENSSSAG00000090486	heart	220.16	0.359823	0.104747	3.43515	0.000592218	0.0301382	tmem187			tmem187
ENSSSAG00000090549	heart	467.361	-0.636128	0.197282	-3.22447	0.00126207	0.0464791					protein sprouty homolog 3-like
ENSSSAG00000090937	heart	845.752	1.03158	0.292022	3.53255	0.000411567	0.0248067					no match	Y
ENSSSAG00000090988	heart	585.106	-0.639107	0.152465	-4.19183	2.77e-05	0.00594797	TRAP1	TRAP1		TRAP1	TNF Receptor Associated Protein 1	N
ENSSSAG00000091496	heart	598.283	0.447537	0.117627	3.80473	0.000141961	0.013999	SAP18	SAP18		SAP18	Sin3A Associated Protein 18	N
ENSSSAG00000091598	filet	6.80426	4.24511	0.938351	4.52401	6.07e-06	0.0487836	upk1a			upk1a	uroplakin 1a
ENSSSAG00000091677	heart	84.4894	0.913352	0.265422	3.44114	0.000579277	0.0295915					no match
ENSSSAG00000091762	heart	104.998	-0.796713	0.191929	-4.15108	3.31e-05	0.00655042	CUX1	CUX1		CUX1	Cut Like Homeobox 1	N
ENSSSAG00000091946	heart	61.1152	1.32659	0.378948	3.50073	0.000463989	0.0265767					no match
ENSSSAG00000092011	heart	499.048	0.263633	0.0811325	3.24941	0.00115644	0.0444957				fam89b	family with sequence similarity 89 member B
ENSSSAG00000092349	heart	520.661	-0.472475	0.136523	-3.46077	0.000538627	0.0286807	rnls	rnls		rnls	Renalase, FAD Dependent Amine Oxidase	N
ENSSSAG00000092615	heart	114.989	-0.972241	0.228771	-4.24984	2.14e-05	0.00514202	slc25a14	slc25a14		slc25a14	Solute Carrier Family 25 Member 14	N
ENSSSAG00000092642	heart	331.145	-1.04929	0.232127	-4.52032	6.17e-06	0.00256222	smim12	smim12		smim12	Small Integral Membrane Protein 12	N
ENSSSAG00000092647	heart	90.9701	0.806391	0.241892	3.33369	0.000857034	0.0377584					fibrinogen-like protein 1
ENSSSAG00000092666	heart	211.665	0.810615	0.253138	3.20226	0.00136352	0.0489711	NDK5			NDK5
ENSSSAG00000092912	heart	711.022	-0.563859	0.162111	-3.47823	0.000504733	0.0277305					BTB/POZ domain-containing protein KCTD12-like
ENSSSAG00000093209	heart	719.423	-0.521507	0.145896	-3.57452	0.000350873	0.0225041					sarcoplasmic/endoplasmic reticulum calcium ATPase 2-like
ENSSSAG00000093278	heart	76.4421	-1.21897	0.252434	-4.82888	1.37e-06	0.000947778					Salmo trutta sorting nexin-19-like	Y	XM_029720113.1
ENSSSAG00000093297	heart	729.719	-0.755172	0.218856	-3.45054	0.000559459	0.0290325	dbpa			dbpa
ENSSSAG00000093600	heart	3824.27	0.810202	0.191454	4.23184	2.32e-05	0.00547362	ZFP36L2	ZFP36L2		ZFP36L2	ZFP36 ring finger protein like 2	N
ENSSSAG00000093789	heart	161.576	0.807827	0.167749	4.81571	1.47e-06	0.000952219					no match	Y
ENSSSAG00000093826	heart	652.663	-0.536051	0.159576	-3.35922	0.00078163	0.0360681					LETM1 domain-containing protein LETM2, mitochondrial
ENSSSAG00000093886	heart	211.144	-0.94849	0.211092	-4.49325	7.01e-06	0.00262064	mtfr1l	mtfr1l		mtfr1l	Mitochondrial Fission Regulator 1 Like	N
ENSSSAG00000094035	heart	252.3	-0.595478	0.121453	-4.90296	9.44e-07	0.000819804	ABCC1			ABCC1
ENSSSAG00000094520	heart	136.925	-0.632381	0.134737	-4.69344	2.69e-06	0.00147596	foxn3	foxn3		foxn3	Forkhead Box N3	N
ENSSSAG00000094623	heart	277.041	0.681284	0.181592	3.75173	0.000175617	0.0158068	GNA14			GNA14
ENSSSAG00000094775	heart	326.453	-0.592694	0.185162	-3.20095	0.00136977	0.0490093				si:ch73-71c20.5	DUF4748 domain-containing protein
ENSSSAG00000094830	heart	458.019	-0.402379	0.11788	-3.41346	0.000641432	0.0316264	ano10a	ano10		ano10	Anoctamin 10	N
ENSSSAG00000094999	heart	409.036	0.609316	0.142546	4.27452	1.92e-05	0.00481938					no match	Y
ENSSSAG00000095383	heart	48.5279	-0.922417	0.28154	-3.27633	0.00105165	0.0425096	tigara	tigara		tigara		N
ENSSSAG00000095460	heart	109.615	1.10234	0.284926	3.86887	0.00010934	0.0121634					platelet endothelial cell adhesion molecule-like	N
ENSSSAG00000095485	heart	55.2366	-1.40607	0.32172	-4.37049	1.24e-05	0.00379243					no match	Y
ENSSSAG00000095716	heart	262.04	0.509835	0.132559	3.84609	0.000120018	0.0128764	ppp1r3da	ppp1r3da		ppp1r3da	Protein Phosphatase 1 Regulatory Subunit 3D	N
ENSSSAG00000095799	heart	171.422	-0.730316	0.2116	-3.4514	0.000557692	0.0290325	HACD3			HACD3
ENSSSAG00000096137	heart	87.5852	2.9741	0.575504	5.16781	2.37e-07	0.000303631					Fc receptor-like protein 5
ENSSSAG00000096175	heart	215.656	-0.761721	0.191076	-3.98649	6.71e-05	0.00911763	acat2	acat2		acat2	Acetyl-CoA Acetyltransferase 2	N
ENSSSAG00000096568	heart	64.1122	-0.865239	0.270395	-3.19991	0.00137471	0.049018					no match
ENSSSAG00000096845	heart	2201.09	-1.3788	0.41269	-3.34101	0.000834754	0.0372526	ADAMTS8			ADAMTS8
ENSSSAG00000096905	heart	241.588	-0.397063	0.114715	-3.46131	0.000537551	0.0286807	pgap6			pgap6
ENSSSAG00000097016	heart	292.571	-0.650918	0.1554	-4.18867	2.81e-05	0.00594797	ITPR1	ITPR1		ITPR1	Inositol 1,4,5-Trisphosphate Receptor Type 1	N
ENSSSAG00000097365	heart	223.898	0.726812	0.209052	3.47671	0.000507614	0.0278319	spink2.5	spink2.1		spink2.1	serine peptidase inhibitor, Kazal type 2, tandem duplicate 1	N
ENSSSAG00000097426	heart	472.249	0.368515	0.113992	3.23281	0.00122577	0.0458607	MCUB			MCUB
ENSSSAG00000097523	heart	113	0.60496	0.166849	3.62579	0.000288082	0.0202565	si:ch211-140b10.6	polr1d		polr1d	RNA Polymerase I And III Subunit D	N
ENSSSAG00000097563	heart	165.995	0.679872	0.212318	3.20214	0.00136411	0.0489711	NTHL1			NTHL1
ENSSSAG00000097657	heart	113.452	0.527969	0.162442	3.2502	0.00115325	0.0444792					no match
ENSSSAG00000098459	heart	11702.1	0.397024	0.111176	3.57114	0.000355427	0.0225041	rpl31	rpl31		rpl31	Ribosomal Protein L31	N
ENSSSAG00000098771	heart	133.92	-0.579695	0.150918	-3.84112	0.000122476	0.012981					no match
ENSSSAG00000099299	heart	246.857	-0.712873	0.19283	-3.6969	0.00021825	0.0172302		pxmp4		pxmp4	Peroxisomal Membrane Protein 4	N
ENSSSAG00000099524	heart	678.932	1.40215	0.333348	4.20627	2.6e-05	0.0059231	nfil3-5	nfil3-5		nfil3-5		N
ENSSSAG00000099524	ADMs	332.642	1.6032	0.359967	4.45375	8.44e-06	0.0262478	nfil3-5	nfil3-5		nfil3-5		N
ENSSSAG00000099623	stomach	502.92	-3.48267	0.753008	-4.62501	3.75e-06	0.0248988	fkbp5	fkbp5		fkbp5	FKBP Prolyl Isomerase 5	N
ENSSSAG00000099687	heart	711.423	-1.25445	0.330933	-3.79065	0.000150256	0.0145505					no match
ENSSSAG00000099782	heart	64.6263	0.825585	0.256139	3.22319	0.00126771	0.0465592					transmembrane protein 200B-like	N
ENSSSAG00000099847	heart	108.601	0.691208	0.200366	3.44973	0.000561146	0.0290325					gastrula zinc finger protein XlCGF7.1-like
ENSSSAG00000099897	heart	42.987	-0.998761	0.289389	-3.45128	0.000557936	0.0290325	TPPP	TPPP		TPPP	Tubulin Polymerization Promoting Protein	N
ENSSSAG00000099913	heart	47.2919	0.859509	0.245603	3.49959	0.000465978	0.0266311	wu:fc63a07	wu:fc63a07		wu:fc63a07		N
ENSSSAG00000100053	heart	1370.62	0.523347	0.156246	3.34951	0.000809533	0.0365049	pnrc2			pnrc2
ENSSSAG00000100218	heart	377.36	0.560952	0.144164	3.89108	9.98e-05	0.0115308	mcrip1			mcrip1
ENSSSAG00000100294	heart	6978.06	0.485054	0.120533	4.02423	5.72e-05	0.00854501					ubiquitin-40S ribosomal protein S27a	N
ENSSSAG00000100553	heart	824.238	0.33368	0.0994806	3.35422	0.000795885	0.0361922					no match
ENSSSAG00000100596	heart	416.087	-0.28304	0.0805179	-3.51525	0.000439345	0.0258541	nbas			nbas
ENSSSAG00000100996	heart	265.068	-0.608355	0.187611	-3.24264	0.00118429	0.0449109	dbpa			dbpa
ENSSSAG00000101039	heart	223.898	-0.967371	0.24622	-3.92888	8.53e-05	0.0107358		trib2		trib2	Tribbles Pseudokinase 2	N
ENSSSAG00000101066	heart	37.011	-1.23313	0.275391	-4.47774	7.54e-06	0.00270776	ERC1			ERC1
ENSSSAG00000101360	heart	51.4442	0.865032	0.243718	3.54932	0.000386228	0.023631					no match
ENSSSAG00000101552	heart	487.347	0.553591	0.148215	3.73507	0.000187666	0.0162449		calhm2		calhm2	Calcium Homeostasis Modulator Family Member 2	N
ENSSSAG00000101643	heart	73.4917	-0.788323	0.176243	-4.47292	7.72e-06	0.00271804	bco1l	bco1l		bco1l		N
ENSSSAG00000101789	heart	261.255	0.633799	0.18159	3.49027	0.000482532	0.027063					no match	Y
ENSSSAG00000102224	heart	169.672	0.514249	0.141035	3.64625	0.0002661	0.0195196	zgc:63882				multiple myeloma tumor-associated protein 2 homolog	N
ENSSSAG00000103079	heart	39.1641	1.1933	0.34627	3.44615	0.000568632	0.0292699					no match	Y
ENSSSAG00000103129	heart	1980.07	-0.579376	0.175466	-3.30193	0.000960224	0.0400949	pdlim7			pdlim7
ENSSSAG00000103136	heart	204.026	1.16144	0.354634	3.27504	0.00105648	0.0425773				im:7151449	complement decay-accelerating factor
ENSSSAG00000103201	heart	316.889	0.478843	0.111861	4.2807	1.86e-05	0.00476557					gastrula zinc finger protein XlCGF26.1-like	N
ENSSSAG00000103269	heart	262.037	-0.817823	0.158822	-5.1493	2.61e-07	0.000319939	pds5a	pds5a		pds5a	PDS5 Cohesin Associated Factor A	N
ENSSSAG00000103389	heart	9787.77	0.389883	0.0972678	4.00835	6.11e-05	0.00874994	rps10	rps10		rps10	Ribosomal Protein S10	N
ENSSSAG00000103564	heart	5245.1	0.454838	0.1322	3.44053	0.000580579	0.0296018				rs15a	40S ribosomal protein S15a
ENSSSAG00000103763	heart	4362.63	-0.498734	0.152619	-3.26783	0.00108375	0.0430956	DLST			DLST
ENSSSAG00000103988	heart	534.906	0.583594	0.172354	3.38603	0.000709116	0.0339078	si:dkey-22o12.2			si:dkey-22o12.2
ENSSSAG00000104588	heart	3173.34	0.864664	0.230929	3.74428	0.00018091	0.0159622	pik3ip1	P3IP1		P3IP1		N
ENSSSAG00000104856	heart	840.748	-0.534388	0.1439	-3.7136	0.000204328	0.0168734	EHBP1	ehbp1		ehbp1	EH Domain Binding Protein 1	N
ENSSSAG00000105306	heart	874.728	-0.554251	0.152387	-3.63713	0.000275696	0.0198766	TIM8A	TIMM8A		TIMM8A	Translocase Of Inner Mitochondrial Membrane 8A	N
ENSSSAG00000105399	heart	1216.03	-0.913703	0.269235	-3.3937	0.00068956	0.0331675	micos13			micos13
ENSSSAG00000105647	heart	311.46	0.664561	0.19519	3.40469	0.000662396	0.0324225					no match
ENSSSAG00000105677	heart	151.391	-1.08933	0.243126	-4.48052	7.45e-06	0.00270776					huntingtin-like
ENSSSAG00000105729	heart	359.183	-1.51192	0.416545	-3.62966	0.000283795	0.020098	bag4	bag4		bag4	BAG Cochaperone 4	N
ENSSSAG00000105947	ADMs	27.0842	-7.94385	1.39204	-5.70664	1.15e-08	0.000159231					butyrophilin-like protein 8	N
ENSSSAG00000106004	heart	172.82	0.548752	0.132967	4.12699	3.68e-05	0.00696802					no match	Y
ENSSSAG00000106218	heart	242.304	0.606346	0.15635	3.87812	0.000105267	0.0119071	nkain1	nkain1		nkain1	Sodium/Potassium Transporting ATPase Interacting 1	N
ENSSSAG00000106231	heart	488.308	-0.754354	0.169348	-4.45447	8.41e-06	0.0028322				g45ip	Growth arrest and DNA-damage-inducible proteins-interacting protein 1	N
ENSSSAG00000106508	heart	202.724	-0.792055	0.199823	-3.96379	7.38e-05	0.00968765					SLIT and NTRK-like protein 3
ENSSSAG00000106621	ADMs	20.1389	3.3364	0.739869	4.50944	6.5e-06	0.0233075					no match	Y
ENSSSAG00000106909	heart	428.323	-0.730183	0.133317	-5.47704	4.33e-08	8.32e-05					no match	Y
ENSSSAG00000106914	heart	442.801	-0.725403	0.153684	-4.72011	2.36e-06	0.00141017	nsfl1c	nsfl1c		nsfl1c	NSFL1 Cofactor	N
ENSSSAG00000107288	heart	1513.21	0.466334	0.107881	4.32265	1.54e-05	0.00433714					no match	Y
ENSSSAG00000107836	heart	12799.2	0.331768	0.101471	3.2696	0.00107701	0.042948					ribosomal protein S27-3
ENSSSAG00000107958	heart	4073.92	0.294226	0.089614	3.28326	0.00102614	0.0419193	RS17			RS17
ENSSSAG00000108573	heart	868.229	-0.828062	0.199614	-4.14831	3.35e-05	0.00658159	PPARGC1A			PPARGC1A
ENSSSAG00000108594	heart	154.56	-3.15621	0.861979	-3.66159	0.000250657	0.0189467					no match
ENSSSAG00000108746	heart	60.5884	-2.10382	0.580925	-3.6215	0.000292898	0.0204278					no match
ENSSSAG00000108775	heart	36.1075	0.882996	0.265451	3.3264	0.000879758	0.0382617		tceanc		tceanc	Transcription Elongation Factor A N-Terminal And Central Domain Containing	N
ENSSSAG00000108796	heart	1058.6	0.281285	0.0878816	3.20072	0.00137082	0.0490093	fam199x			fam199x
ENSSSAG00000109121	heart	509.114	-0.705874	0.138076	-5.1122	3.18e-07	0.000346978	mrpl12	mrpl12		mrpl12	Mitochondrial Ribosomal Protein L12	N
ENSSSAG00000109221	heart	12467.7	-0.490716	0.136945	-3.58332	0.00033926	0.0222762	ccng1			ccng1
ENSSSAG00000109443	heart	90.8182	-0.612843	0.185857	-3.29738	0.000975896	0.0402946				fbxl8	F-box and leucine-rich repeat protein 8
ENSSSAG00000109848	heart	1295.79	1.11879	0.271794	4.11632	3.85e-05	0.00713728					fibroblast growth factor receptor-like 1	N
ENSSSAG00000109892	heart	7420.72	0.387389	0.106356	3.64237	0.000270141	0.0197086				rs16	40S ribosomal protein S16	N
ENSSSAG00000110442	heart	102.911	-1.24997	0.312273	-4.00282	6.26e-05	0.00877817					no match	Y
ENSSSAG00000110723	heart	163.876	0.618668	0.178765	3.46078	0.000538607	0.0286807					no match
ENSSSAG00000111101	heart	223.733	0.745007	0.191066	3.8992	9.65e-05	0.0113954	cssa01h5orf63	cssa01h5orf63		cssa01h5orf63		N
ENSSSAG00000111233	heart	399.784	0.839916	0.218303	3.84748	0.000119341	0.0128764					Oncorhynchus keta ferritin, heavy subunit-like¬†	Y	XM_035790734.2
ENSSSAG00000111521	heart	119.739	-0.68669	0.214749	-3.19764	0.00138559	0.0491351	purba			purba
ENSSSAG00000111649	heart	75.9142	0.435521	0.134102	3.24768	0.00116349	0.0446185					oocyte zinc finger protein XlCOF6-like
ENSSSAG00000111807	heart	1450.46	0.371503	0.109873	3.3812	0.000721695	0.0342055	tinp1			tinp1
ENSSSAG00000111976	heart	270.089	-0.889196	0.273211	-3.25461	0.0011355	0.0441745					tyrosine-protein phosphatase non-receptor type 11-like
ENSSSAG00000111990	stomach	31.0357	-6.30011	1.30247	-4.83703	1.32e-06	0.0171803					no match	Y
ENSSSAG00000112053	ADMs	45.6993	-3.50948	0.757119	-4.63531	3.56e-06	0.0191704				osteocalcin 2b	osteocalcin 2b	N
ENSSSAG00000112164	heart	1188.43	-0.506912	0.125034	-4.05418	5.03e-05	0.00825872	EIF4G1			EIF4G1	eukaryotic translation initiation factor 4 gamma 1-like	N
ENSSSAG00000112338	heart	325.3	0.865784	0.220555	3.92549	8.66e-05	0.0108227					no match	Y
ENSSSAG00000112472	heart	81.2054	0.580444	0.176672	3.28543	0.00101828	0.0417248					no match
ENSSSAG00000112478	heart	96.7079	0.434349	0.134754	3.22327	0.00126736	0.0465592					zinc finger protein 239-like
ENSSSAG00000112871	ADMs	26.1187	-3.23731	0.483948	-6.68937	2.24e-11	7.23e-07					Salmo salar zinc finger protein 250-like	Y	XM_045722360.1
ENSSSAG00000112871	heart	146.485	-2.34492	0.72316	-3.2426	0.00118446	0.0449109					Salmo salar zinc finger protein 250-like	Y	XM_045722360.1
ENSSSAG00000112918	heart	1142.84	-0.786962	0.190649	-4.1278	3.66e-05	0.00696802	PITRM1	PITRM1		PITRM1	Pitrilysin Metallopeptidase 1	N
ENSSSAG00000112929	heart	919.396	-0.731632	0.207763	-3.52148	0.000429143	0.0254282	pcca	pcca		pcca	Propionyl-CoA Carboxylase Subunit Alpha	N
ENSSSAG00000113417	heart	1857.45	0.374407	0.112745	3.32083	0.000897492	0.0386501	rxrbb			rxrbb
ENSSSAG00000113466	heart	1025.78	-0.505177	0.126066	-4.00725	6.14e-05	0.00874994		ganab		ganab	Glucosidase II Alpha Subunit	N
ENSSSAG00000113763	heart	419.759	-0.66176	0.169359	-3.90744	9.33e-05	0.0111826	cavin4a	cavin4a		cavin4a		N
ENSSSAG00000113846	heart	137.752	-0.970712	0.24805	-3.91337	9.1e-05	0.0111826	mri1	mri1		mri1	Methylthioribose-1-Phosphate Isomerase 1	N
ENSSSAG00000113873	ADMs	4.58366	-5.42765	1.18869	-4.56606	4.97e-06	0.022913					no match	Y
ENSSSAG00000114064	heart	287.242	-0.953323	0.286178	-3.33122	0.000864647	0.0377876					centrosome-associated protein 350-like
ENSSSAG00000114215	heart	280.35	0.303454	0.0881615	3.44203	0.000577369	0.0295501					zinc finger protein 292-like
ENSSSAG00000114546	heart	124.25	-0.970684	0.254268	-3.81757	0.000134773	0.0135888	prkacab	prkacab		prkacab	Protein Kinase CAMP-Activated Catalytic Subunit Alpha	N
ENSSSAG00000114554	heart	938.11	0.606194	0.149692	4.04961	5.13e-05	0.00832436	sap18	sap18		sap18	Sin3A Associated Protein 18	N
ENSSSAG00000114797	heart	456.516	0.491578	0.141605	3.47148	0.000517599	0.02815		igfals		igfals	Insulin Like Growth Factor Binding Protein Acid Labile Subunit	N
ENSSSAG00000114923	heart	117.779	-0.65992	0.17321	-3.80994	0.000139002	0.0138084		aldh1l2		aldh1l2	Aldehyde Dehydrogenase 1 Family Member L2	N
ENSSSAG00000115374	heart	125.354	0.723393	0.226222	3.19771	0.00138522	0.0491351					no match
ENSSSAG00000115603	heart	31038.1	1.67778	0.399308	4.20173	2.65e-05	0.00594797	tnni1b	TNNI1		TNNI1	Troponin I1, Slow Skeletal Type	N
ENSSSAG00000115724	heart	546.84	0.375969	0.112298	3.34795	0.00081413	0.0365536					no match
ENSSSAG00000115848	heart	349.069	0.730217	0.155068	4.70901	2.49e-06	0.0014258	SPHK1	SPHK1		SPHK1	Sphingosine Kinase 1	N
ENSSSAG00000115945	heart	108.231	-0.883619	0.204011	-4.33123	1.48e-05	0.00433714	ABCC1	abcc1		abcc1	ATP Binding Cassette Subfamily C Member 1	N
ENSSSAG00000116058	heart	66.2363	-1.10124	0.294433	-3.74019	0.000183878	0.0161243	xylt1			xylt1
ENSSSAG00000116094	heart	59.9009	-0.966831	0.213614	-4.52607	6.01e-06	0.00256222					no match	Y
ENSSSAG00000116104	stomach	57.2	19.2556	3.05846	6.29583	3.06e-10	1.02e-05					Salmo salar H-2 class I histocompatibility antigen, Q8 alpha chain-like	Y	XM_045711165.1
ENSSSAG00000116104	heart	289.043	20.016	3.05831	6.54477	5.96e-11	5.35e-07					Salmo salar H-2 class I histocompatibility antigen, Q8 alpha chain-like	Y	XM_045711165.1
ENSSSAG00000116233	ADMs	62.0197	1.84195	0.355651	5.17911	2.23e-07	0.00179883					double-strand-break repair protein rad21 homolog A-like	N
ENSSSAG00000116316	heart	52.8769	-1.01067	0.294408	-3.43288	0.000597206	0.0301816					no match	Y
ENSSSAG00000116401	heart	137.071	0.639729	0.167401	3.82153	0.000132629	0.0135486					zinc finger protein 135-like	N
ENSSSAG00000116562	heart	895.597	-0.618095	0.187346	-3.29921	0.000969565	0.0402946	timm23a			timm23a
ENSSSAG00000116903	heart	378.953	0.388751	0.0964571	4.0303	5.57e-05	0.00854501		zgc:162025		zgc:162025		N
ENSSSAG00000116917	heart	289.432	1.04788	0.316301	3.31293	0.00092324	0.039141				hop	Homeodomain-only protein
ENSSSAG00000117027	heart	93.5104	-1.47635	0.411353	-3.58901	0.000331941	0.0220103		ssh2a		ssh2a	Slingshot Protein Phosphatase 2	N
ENSSSAG00000117042	heart	246.726	-0.801125	0.249207	-3.2147	0.00130583	0.0478222	s1pr2			s1pr2
ENSSSAG00000117122	heart	191.261	1.04757	0.305077	3.43379	0.000595209	0.0301763	rab6ba	rab6ba		rab6ba	RAB6B, Member RAS Oncogene Family	N
ENSSSAG00000117201	heart	111.102	0.689494	0.201263	3.42584	0.000612908	0.0306693					no match	Y
ENSSSAG00000117307	heart	294.117	-0.53847	0.155602	-3.46055	0.000539076	0.0286807	RT07			RT07
ENSSSAG00000117434	heart	212.106	0.681646	0.211236	3.22694	0.0012512	0.0461418					no match
ENSSSAG00000117541	heart	97.617	0.569428	0.163106	3.49116	0.000480937	0.0270479	CNOT2			CNOT2
ENSSSAG00000117625	heart	257.741	0.411249	0.124761	3.29629	0.000979716	0.0403287	arl5a			arl5a
ENSSSAG00000118289	ADMs	114.197	-1.906	0.446161	-4.27201	1.94e-05	0.0446566					no match
ENSSSAG00000119148	heart	219.367	0.643499	0.167752	3.83602	0.000125043	0.0130984				znf414	zinc finger protein 414	N
ENSSSAG00000119216	heart	647.789	-0.425848	0.128888	-3.30401	0.000953116	0.0400294					no match
ENSSSAG00000119387	heart	141.483	-0.806839	0.192038	-4.20145	2.65e-05	0.00594797	vps37c	vps37c		vps37c	VPS37C Subunit Of ESCRT-I	N
ENSSSAG00000119392	heart	3018.21	-0.69412	0.194427	-3.57008	0.000356866	0.0225041					mitochondrial fission process protein 1	N
ENSSSAG00000119642	heart	82.5421	0.797641	0.24477	3.25874	0.0011191	0.0438496					no match	Y
ENSSSAG00000120132	heart	759.818	-0.543398	0.11598	-4.68526	2.8e-06	0.00150543		cltb		cltb	Clathrin Light Chain B	N
ENSSSAG00000120238	heart	275.999	0.376527	0.11392	3.30518	0.000949142	0.0399271	mrgbp			mrgbp
ENSSSAG00000120264	heart	152.937	0.543071	0.167259	3.24689	0.00116672	0.0446791					no match
ENSSSAG00000120350	heart	311.641	0.43975	0.132511	3.31859	0.000904746	0.0387227					no match	Y
ENSSSAG00000120375	heart	342.972	0.434133	0.12441	3.48953	0.000483876	0.027082	ugt5e1	ugt5e1		ugt5e1		N
ENSSSAG00000120388	heart	718.667	-0.416215	0.127947	-3.25302	0.00114186	0.0442939	ppp1r37			ppp1r37
ENSSSAG00000120478	heart	122.795	-1.13042	0.171395	-6.59541	4.24e-11	5.35e-07	tdh	tdh		tdh	L-Threonine Dehydrogenase (Pseudogene)	N
ENSSSAG00000120551	heart	41.5081	-1.05865	0.292012	-3.62536	0.000288554	0.0202565	CIART			CIART
ENSSSAG00000120610	heart	84.5645	-1.04028	0.295983	-3.51466	0.000440313	0.0258541					no match	Y
ENSSSAG00000120620	heart	110.375	-1.04876	0.260515	-4.02573	5.68e-05	0.00854501					V-type proton ATPase subunit S1-like	N
ENSSSAG00000120793	heart	66.5714	-2.28612	0.577689	-3.95735	7.58e-05	0.00985617					no match
ENSSSAG00000120928	heart	4286.86	-0.763391	0.19186	-3.9789	6.92e-05	0.00923826	ndufs8a	ndufs8a		ndufs8a	NADH:Ubiquinone Oxidoreductase Core Subunit S8	N
ENSSSAG00000121039	heart	153.835	0.79712	0.226968	3.51204	0.000444682	0.0259681	mkrn1	mkrn1		mkrn1	Makorin Ring Finger Protein 1	N
ENSSSAG00000121071	heart	211.503	-0.432776	0.128721	-3.36212	0.000773467	0.035905				usp8	ubiquitin specific peptidase 8
ENSSSAG00000121563	heart	2167.35	-0.570759	0.144754	-3.94297	8.05e-05	0.0102198	sdhdb	sdhdb		sdhdb	Succinate Dehydrogenase Complex Subunit D	N
ENSSSAG00000121578	heart	726.946	0.373955	0.0934814	4.00032	6.33e-05	0.00877817	arfrp1	arfrp1		arfrp1	ADP Ribosylation Factor Related Protein 1	N
ENSSSAG00000121662	heart	41.9803	-0.902162	0.236526	-3.81422	0.000136614	0.0137132		si:ch211-175f12.2		si:ch211-175f12.2		N
ENSSSAG00000121834	heart	388.235	0.865305	0.23041	3.75549	0.000172999	0.0157875	cry3b	cry3b		cry3b		N
ENSSSAG00000122032	heart	582.973	0.584201	0.149891	3.89751	9.72e-05	0.0114254					twist-related protein 2
ENSSSAG00000122198	heart	295.688	0.518333	0.123486	4.19749	2.7e-05	0.00594797					mediator of RNA polymerase II transcription subunit 26	N
novel.1144	heart	146.521	-0.643373	0.193727	-3.32103	0.000896872	0.0386501					no match
novel.15	heart	123.688	0.479873	0.149447	3.21099	0.00132279	0.0480683					no match
novel.163	heart	203.641	0.507562	0.127818	3.97099	7.16e-05	0.00949183					no match	Y
novel.20	heart	141.669	1.26663	0.278894	4.54163	5.58e-06	0.00249366					no match	Y
novel.214	heart	203.993	1.87954	0.321249	5.85072	4.89e-09	1.64e-05					no match	Y
novel.265	heart	124.683	4.07142	0.727844	5.59381	2.22e-08	4.6e-05					no match	Y
novel.269	heart	572.976	1.00403	0.292544	3.43206	0.000599026	0.0301931					no match	Y
novel.284	heart	102.155	1.46819	0.437477	3.35603	0.000790701	0.0360697					no match
novel.758	heart	45.3375	0.741445	0.192783	3.84602	0.000120054	0.0128764					no match	Y
novel.859	heart	113.423	0.698833	0.186232	3.75249	0.000175088	0.0158068					no match	Y
novel.86	heart	265.158	0.386474	0.111937	3.45259	0.000555234	0.0290325					no match
novel.909	heart	169.757	0.547193	0.114699	4.7707	1.84e-06	0.0011494					no match	Y
novel.952	heart	1362.44	0.648934	0.184108	3.52475	0.000423875	0.0253123					no match

## Sheet: S5-KEGG
category	subcategory	ID	Description	GeneRatio	BgRatio	pvalue	p.adjust	qvalue	geneID	Count
Genetic Information Processing	Translation	sasa03010	Ribosome - Salmo salar (Atlantic salmon)	23/213	286/14120	5.95885e-11	6.43555e-09	5.39432e-09	106577306/106605749/106591238/106610677/100286555/106573332/106607915/100195451/100196552/106600986/100194595/106582252/106589133/106570065/106577218/106608423/100194649/100195593/106612153/100194654/106606250/106606582/106606611	23
Metabolism	Global and overview maps	sasa01200	Carbon metabolism - Salmo salar (Atlantic salmon)	20/213	256/14120	1.88102e-09	1.01575e-07	8.51411e-08	100380798/106611092/100195460/106593318/106587404/106589533/106562243/106560816/100380782/100194617/106587025/106572524/100194765/106579549/106587214/106567176/106578535/100194920/106608299/106580927	20
Metabolism	Global and overview maps	sasa01230	Biosynthesis of amino acids - Salmo salar (Atlantic salmon)	14/213	174/14120	3.85288e-07	1.38704e-05	1.16262e-05	100380798/100195460/106587404/106589533/106562243/106560816/100194617/100380546/106572524/100194765/106579549/106587214/106567176/106578535	14
Cellular Processes	Transport and catabolism	sasa04137	Mitophagy - animal - Salmo salar (Atlantic salmon)	17/213	269/14120	6.84688e-07	1.84866e-05	1.54956e-05	106614017/100196559/100196362/106584661/106560578/106574090/106605979/106576153/106588861/106571799/106573130/106561541/106613511/106609324/106577557/100194654/106592072	17
Metabolism	Global and overview maps	sasa01210	2-Oxocarboxylic acid metabolism - Salmo salar (Atlantic salmon)	9/213	71/14120	1.13185e-06	2.4448e-05	2.04925e-05	106587404/106589533/106562243/106560816/106587025/106572524/106579549/106567176/106608299	9
Metabolism	Carbohydrate metabolism	sasa00020	Citrate cycle (TCA cycle) - Salmo salar (Atlantic salmon)	7/213	72/14120	0.000103364	0.00186056	0.00155953	106611092/106589533/106587025/106572524/106567176/106608299/106580927	7
Genetic Information Processing	Translation	sasa00970	Aminoacyl-tRNA biosynthesis - Salmo salar (Atlantic salmon)	6/213	69/14120	0.000596818	0.00920804	0.00771824	106560991/106565968/106583785/106586603/106610180/106589047	6

## Sheet: S6-Gene Duplicates
ensemblID	muscle	baseMean	log2FoldChange.x	lfcSE	stat	pvalue	padj	biomart_gene_name	gene_name_original	gene_name_BLAST/NCBI	gene_name_all	Gene Description from Biomart, BLAST, or NCBI gene search
ENSSSAG00000115945	heart	108.231	-0.883619	0.204011	-4.33123	1.48e-05	0.00433714	ABCC1	abcc1		abcc1	ATP Binding Cassette Subfamily C Member 1
ENSSSAG00000094035	heart	252.3	-0.595478	0.121453	-4.90296	9.44e-07	0.000819804	ABCC1			ABCC1	ATP Binding Cassette Subfamily C Member 1
ENSSSAG00000013940	heart	247.718	-0.678717	0.177979	-3.81348	0.000137025	0.0137132	acaca	acaca		acaca	Acetyl-CoA Carboxylase Alpha
ENSSSAG00000043995	heart	96.0171	-0.797653	0.247183	-3.22697	0.00125109	0.0461418	acaca			acaca	Acetyl-CoA Carboxylase Alpha
ENSSSAG00000072585	heart	360.721	-0.757637	0.168088	-4.50738	6.56e-06	0.00257812	ACSF3	acsf3		acsf3	Acyl-CoA Synthetase Family Member 3
ENSSSAG00000066800	heart	43.5273	-0.950235	0.288167	-3.29752	0.000975445	0.0402946	ACSF3			ACSF3	Acyl-CoA Synthetase Family Member 3
ENSSSAG00000007690	heart	4702.68	-1.64433	0.443724	-3.70575	0.000210763	0.0170166	ACTA1	ACTA1		ACTA1	Actin Alpha 1, Skeletal Muscle
ENSSSAG00000062181	heart	36881.5	-1.02445	0.292409	-3.50347	0.000459235	0.0264734	ACTA1	ACTA1		ACTA1	Actin Alpha 1, Skeletal Muscle
ENSSSAG00000082362	heart	1451.51	0.511048	0.126261	4.04754	5.18e-05	0.0083427	anp32b	anp32b		anp32b	Acidic Nuclear Phosphoprotein 32 Family Member B
ENSSSAG00000001972	heart	1416.18	0.502187	0.150991	3.32593	0.000881231	0.0382639	anp32b			anp32b	Acidic Nuclear Phosphoprotein 32 Family Member B
ENSSSAG00000043938	heart	1122.28	-0.574733	0.112473	-5.10996	3.22e-07	0.000346978	ap1b1	ap1b1		ap1b1	Adaptor Related Protein Complex 1 Subunit Beta 1
ENSSSAG00000045173	heart	576.08	-0.490781	0.10782	-4.55185	5.32e-06	0.00242642	ap1b1	ap1b1		ap1b1	Adaptor Related Protein Complex 1 Subunit Beta 1
ENSSSAG00000015607	heart	1021.76	0.760217	0.168272	4.51779	6.25e-06	0.00256222	bccip	bccip		bccip	BRCA2 And CDKN1A Interacting Protein
ENSSSAG00000059009	heart	538.433	0.787234	0.178596	4.4079	1.04e-05	0.00330584	bccip	bccip		bccip	BRCA2 And CDKN1A Interacting Protein
ENSSSAG00000000689	heart	9800.31	0.398446	0.0906102	4.39736	1.1e-05	0.00343004		btf3		btf3	Basic Transcription Factor 3
ENSSSAG00000069505	heart	4722.09	0.371788	0.0888203	4.18584	2.84e-05	0.00597537		btf3		btf3	Basic Transcription Factor 3
ENSSSAG00000058620	heart	799.257	-0.698146	0.182139	-3.83304	0.000126571	0.0131561	cluha			cluha	clustered mitochondria (cluA/CLU1) homolog a
ENSSSAG00000069687	heart	768.758	-0.544385	0.155448	-3.50203	0.00046173	0.0265037	cluha			cluha	clustered mitochondria (cluA/CLU1) homolog a
ENSSSAG00000054381	heart	1193.39	0.403721	0.115115	3.50712	0.00045298	0.0261689	CTDS2	CTDS2		CTDS2	carboxy-terminal domain RNA polymerase II polypeptide A small phosphatase 2
ENSSSAG00000078630	heart	1829.1	0.521974	0.143556	3.63603	0.000276874	0.0198766	ctdsp2	CTDS2		CTDS2	carboxy-terminal domain RNA polymerase II polypeptide A small phosphatase 2
ENSSSAG00000112164	heart	1188.43	-0.506912	0.125034	-4.05418	5.03e-05	0.00825872	EIF4G1			EIF4G1	eukaryotic translation initiation factor 4 gamma 1-like
ENSSSAG00000047894	heart	974.815	-0.336625	0.0964011	-3.49192	0.00047956	0.0270479	EIF4G1			EIF4G1	eukaryotic translation initiation factor 4 gamma 1-like
ENSSSAG00000004144	heart	1289.67	0.77355	0.207635	3.72552	0.000194914	0.0165053	EZH1	EZH1		EZH1	Enhancer Of Zeste 1 Polycomb Repressive Complex 2 Subunit
ENSSSAG00000007550	heart	1382.32	0.638897	0.196085	3.25826	0.00112097	0.0438496	EZH1			EZH1	Enhancer Of Zeste 1 Polycomb Repressive Complex 2 Subunit
ENSSSAG00000039519	heart	6284.05	-0.763625	0.213659	-3.57403	0.000351527	0.0225041	AATM	got2a		got2a	Glutamic-Oxaloacetic Transaminase 2
ENSSSAG00000064442	heart	1118.05	-0.993338	0.22121	-4.49048	7.11e-06	0.00262064	got2a	got2a		got2a	Glutamic-Oxaloacetic Transaminase 2
ENSSSAG00000000959	heart	215.4	-1.63193	0.335737	-4.86075	1.17e-06	0.000850856	gys1	gys1		gys1	Glycogen Synthase 1
ENSSSAG00000042664	heart	1353.94	-1.57817	0.367633	-4.29278	1.76e-05	0.00471275	gys1	gys1		gys1	Glycogen Synthase 1
ENSSSAG00000040541	heart	569.691	-0.680489	0.176533	-3.85474	0.000115853	0.0126784	hipk3a	hipk3a		hipk3a	Homeodomain Interacting Protein Kinase 3
ENSSSAG00000004843	heart	369.933	-0.527685	0.130461	-4.04478	5.24e-05	0.0083427	hipk3a			hipk3a	Homeodomain Interacting Protein Kinase 3
ENSSSAG00000040208	heart	1159.8	0.389205	0.10414	3.73733	0.000185982	0.0162041	HMGB1	HMGB1		HMGB1	High Mobility Group Box 1
ENSSSAG00000070305	heart	743.873	0.509445	0.108895	4.67833	2.89e-06	0.00152666	hmgb1b	hmgb1b		hmgb1b	High Mobility Group Box 1
ENSSSAG00000053757	heart	468.844	-0.785053	0.198713	-3.95069	7.79e-05	0.0100859	hspe1			hspe1
ENSSSAG00000081441	heart	1206.76	-0.677636	0.161037	-4.20795	2.58e-05	0.0059231	hspe1			hspe1
ENSSSAG00000003544	heart	398.065	0.45501	0.137051	3.32	0.000900176	0.0386501	mcrip1			mcrip1	mapk-regulated corepressor-interacting protein 1
ENSSSAG00000100218	heart	377.36	0.560952	0.144164	3.89108	9.98e-05	0.0115308	mcrip1			mcrip1	mapk-regulated corepressor-interacting protein 1
ENSSSAG00000002735	heart	721.316	-0.588273	0.137769	-4.27	1.95e-05	0.00483788	mrpl12	mrpl12		mrpl12	Mitochondrial Ribosomal Protein L12
ENSSSAG00000109121	heart	509.114	-0.705874	0.138076	-5.1122	3.18e-07	0.000346978	mrpl12	mrpl12		mrpl12	Mitochondrial Ribosomal Protein L12
ENSSSAG00000041616	heart	208.9	-0.481137	0.129674	-3.71036	0.000206967	0.0169354				mrpl52	mitochondrial ribosomal protein L52
ENSSSAG00000008288	heart	101.506	-0.838976	0.250276	-3.35221	0.000801704	0.0362125	mrpl52			mrpl52	mitochondrial ribosomal protein L52
ENSSSAG00000120928	heart	4286.86	-0.763391	0.19186	-3.9789	6.92e-05	0.00923826	ndufs8a	ndufs8a		ndufs8a	NADH:Ubiquinone Oxidoreductase Core Subunit S8
ENSSSAG00000003745	heart	2243.9	-0.737122	0.219667	-3.35563	0.000791842	0.0360697	ndufs8a			ndufs8a	NADH:Ubiquinone Oxidoreductase Core Subunit S8
ENSSSAG00000078190	heart	867.176	0.493335	0.114007	4.32723	1.51e-05	0.00433714	nmd3	nmd3		nmd3	NMD3 Ribosome Export Adaptor
ENSSSAG00000066482	heart	543.063	0.506584	0.156793	3.2309	0.00123401	0.045885	nmd3			nmd3	NMD3 Ribosome Export Adaptor
ENSSSAG00000007599	heart	642.153	-1.01298	0.29097	-3.48139	0.000498817	0.0275177	pcca	pcca		pcca	Propionyl-CoA Carboxylase Subunit Alpha
ENSSSAG00000112929	heart	919.396	-0.731632	0.207763	-3.52148	0.000429143	0.0254282	pcca	pcca		pcca	Propionyl-CoA Carboxylase Subunit Alpha
ENSSSAG00000079401	heart	400.896	0.531397	0.141317	3.76032	0.000169698	0.0155919	PDCL3	PDCL3		PDCL3	Phosducin Like 3
ENSSSAG00000058071	heart	775.651	0.449205	0.140577	3.19543	0.00139625	0.0491351	PDCL3			PDCL3	Phosducin Like 3
ENSSSAG00000007650	heart	261.967	-0.822795	0.205507	-4.00374	6.23e-05	0.00877817	prep	prep		prep	Prolyl Endopeptidase
ENSSSAG00000062986	heart	129.044	-0.581974	0.176282	-3.30138	0.000962122	0.0400949				prep	prolyl endopeptidase
ENSSSAG00000067926	heart	13856.3	0.396924	0.0961341	4.12886	3.65e-05	0.00696802	rpl19	rpl19		rpl19	Ribosomal Protein L19
ENSSSAG00000046726	heart	1900.91	0.337759	0.0839711	4.02232	5.76e-05	0.00854501	rpl19			rpl19	Ribosomal Protein L19
ENSSSAG00000057006	heart	7562.37	0.314988	0.079997	3.9375	8.23e-05	0.0104062	rpl31	rpl31		rpl31	Ribosomal Protein L31
ENSSSAG00000098459	heart	11702.1	0.397024	0.111176	3.57114	0.000355427	0.0225041	rpl31	rpl31		rpl31	Ribosomal Protein L31
ENSSSAG00000072189	heart	11278.2	0.409421	0.10319	3.96763	7.26e-05	0.00957934	RPL35	RPL35		RPL35	Ribosomal Protein L35
ENSSSAG00000075399	heart	8223.55	0.403843	0.0939557	4.29822	1.72e-05	0.00468186	RPL35	RPL35		RPL35	Ribosomal Protein L35
ENSSSAG00000006134	heart	4336.55	0.419659	0.0986971	4.25199	2.12e-05	0.00513884		rps27.2		rps27.2	Ribosomal protein S27
ENSSSAG00000007965	heart	1657.67	0.501793	0.0824503	6.08601	1.16e-09	4.45e-06		rps27.2		rps27.2	Ribosomal Protein S27
ENSSSAG00000052007	heart	22042.9	0.352334	0.105084	3.35287	0.000799781	0.0361922	RPS3A	RPS3A		RPS3A	Ribosomal Protein S3A
ENSSSAG00000069593	heart	26737	0.341055	0.105157	3.24329	0.00118157	0.0449109	RPS3A			RPS3A	Ribosomal Protein S3A
ENSSSAG00000015449	heart	3403.62	0.457359	0.120407	3.79843	0.000145615	0.0142033	rs17			rs17	40S ribosomal protein S17
ENSSSAG00000107958	heart	4073.92	0.294226	0.089614	3.28326	0.00102614	0.0419193	RS17			RS17	40S ribosomal protein S17
ENSSSAG00000047895	heart	2069.6	-0.573306	0.164549	-3.48411	0.000493776	0.0273548	samm50l	samm50l		samm50l	SAMM50 Sorting And Assembly Machinery Component
ENSSSAG00000076968	heart	3043.59	-0.729382	0.196847	-3.70533	0.00021112	0.0170166	samm50l	samm50l		samm50l	SAMM50 Sorting And Assembly Machinery Component
ENSSSAG00000091496	heart	598.283	0.447537	0.117627	3.80473	0.000141961	0.013999	SAP18	SAP18		SAP18	Sin3A Associated Protein 18
ENSSSAG00000114554	heart	938.11	0.606194	0.149692	4.04961	5.13e-05	0.00832436	sap18	sap18		sap18	Sin3A Associated Protein 18
ENSSSAG00000074712	heart	806.723	-0.680934	0.197798	-3.44257	0.000576206	0.0295468	si:ch211-215a10.4	si:ch211-215a10.4		si:ch211-215a10.4
ENSSSAG00000084385	heart	647.692	-0.439164	0.13404	-3.27636	0.00105156	0.0425096	si:ch211-215a10.4			si:ch211-215a10.4
ENSSSAG00000066339	heart	1413.14	-1.79155	0.541552	-3.30817	0.000939077	0.0396252		slc2a1b		slc2a1b	Solute Carrier Family 2 Member 1
ENSSSAG00000078313	heart	5051.77	-1.02818	0.277593	-3.70391	0.000212304	0.0170336		slc2a1b		slc2a1b	Solute Carrier Family 2 Member 1
ENSSSAG00000038939	heart	802.764	-0.850028	0.229092	-3.71042	0.000206915	0.0169354	SRL	SRL		SRL	Sarcalumenin
ENSSSAG00000049415	heart	5436.61	-0.677873	0.199767	-3.39332	0.000690505	0.0331675	srl	srl		srl	Sarcalumenin
ENSSSAG00000009439	heart	381.957	-1.17771	0.368471	-3.19621	0.00139247	0.0491351	SRL			SRL	Sarcalumenin
ENSSSAG00000007060	heart	166.275	0.644825	0.177285	3.63722	0.000275598	0.0198766	TFAP4	TFAP4		TFAP4	Transcription Factor AP-4
ENSSSAG00000040482	heart	142.334	0.716358	0.159398	4.49414	6.99e-06	0.00262064	TFAP4	TFAP4		TFAP4	Transcription Factor AP-4
ENSSSAG00000090988	heart	585.106	-0.639107	0.152465	-4.19183	2.77e-05	0.00594797	TRAP1	TRAP1		TRAP1	TNF Receptor Associated Protein 1
ENSSSAG00000042515	heart	746.891	-0.822312	0.235707	-3.48871	0.000485359	0.0271086	TRAP1			TRAP1	TNF Receptor Associated Protein 1
ENSSSAG00000002161	heart	713.117	0.394185	0.105835	3.72454	0.000195671	0.0165053	UBC9			UBC9	SUMO-conjugating enzyme UBC9
ENSSSAG00000050408	heart	789.809	0.391618	0.106793	3.66709	0.000245325	0.0187901	UBC9			UBC9	SUMO-conjugating enzyme UBC9
ENSSSAG00000003539	heart	3166.74	-1.0022	0.244901	-4.09228	4.27e-05	0.00743618		uqcrc2a		uqcrc2a	Ubiquinol-Cytochrome C Reductase Core Protein 2
ENSSSAG00000042984	heart	1699.93	-0.962156	0.28239	-3.40719	0.000656353	0.0321852		uqcrc2a		uqcrc2a	Ubiquinol-Cytochrome C Reductase Core Protein 2
ENSSSAG00000053711	heart	915.892	0.272207	0.0804604	3.38312	0.000716662	0.0341473	usf1	usf1		usf1	Upstream Transcription Factor 1
ENSSSAG00000042573	heart	587.351	0.293279	0.0877558	3.34199	0.000831786	0.0372526	usf1			usf1	Upstream Transcription Factor 1
ENSSSAG00000076360	heart	111.421	0.520905	0.15221	3.42227	0.000620997	0.0309018	zbtb14			zbtb14	zinc finger and BTB domain containing 14
ENSSSAG00000085644	heart	139.607	0.453003	0.134264	3.37397	0.000740932	0.0346898	zbtb14			zbtb14	zinc finger and BTB domain containing 14
ENSSSAG00000088515	heart	209.047	0.589096	0.108975	5.4058	6.45e-08	0.000108557					oocyte zinc finger protein XlCOF6-like
ENSSSAG00000111649	heart	75.9142	0.435521	0.134102	3.24768	0.00116349	0.0446185					oocyte zinc finger protein XlCOF6-like
ENSSSAG00000001458	heart	164.673	0.732438	0.1869	3.91888	8.9e-05	0.0110367					platelet endothelial cell adhesion molecule-like
ENSSSAG00000095460	heart	109.615	1.10234	0.284926	3.86887	0.00010934	0.0121634					platelet endothelial cell adhesion molecule-like
ENSSSAG00000067160	heart	11879.9	-0.712966	0.143322	-4.97458	6.54e-07	0.000607004					sarcoplasmic/endoplasmic reticulum calcium ATPase 2-like
ENSSSAG00000093209	heart	719.423	-0.521507	0.145896	-3.57452	0.000350873	0.0225041					sarcoplasmic/endoplasmic reticulum calcium ATPase 2-like
